# Supplementary material for: Synthesis of Novel Benzo[b][1,6]naphthyridine Derivatives and Investigation of Their Potential as Scaffolds of MAO Inhibitors
Source: MDPI journal article supplement (doi:10.3390/molecules28041662), 2023-02-09
Supplement: s1 [file s1]

## Supplementary Materials

# Synthesis of Novel Benzo[*b*][1,6]naphthyridine Derivatives and Investigation of Their Potential as Scaffolds of MAO Inhibitors

Larisa N. Kulikova <sup>1</sup>, Ghulam Reza Raesi <sup>1</sup>, Daria D. Levickaya <sup>1</sup>, Rosa Purgatorio <sup>2</sup>, Gabriella La Spada <sup>2</sup>, Marco Catto <sup>2</sup>, Cosimo D. Altomare <sup>2</sup> and Leonid G. Voskressensky <sup>1,\*</sup>

<sup>1</sup> Organic Chemistry Department, Peoples' Friendship University of Russia (RUDN University), Miklukho-Maklaya St. 6., 117198 Moscow, Russia

<sup>2</sup> Department of Pharmacy-Pharmaceutical Sciences, University of Bari Aldo Moro, Via E. Orabona 4, 70125 Bari, Italy

\* Correspondence: lvoskressensky@sci.pfu.edu.ru; Tel.: +7-495-955-07-29

### Table of Content

1. NMR Data of Derivatives (3-10)

2. A single crystal X-ray analysis of compound 5a

**Figure S1.** The <sup>1</sup>H NMR data of 3a

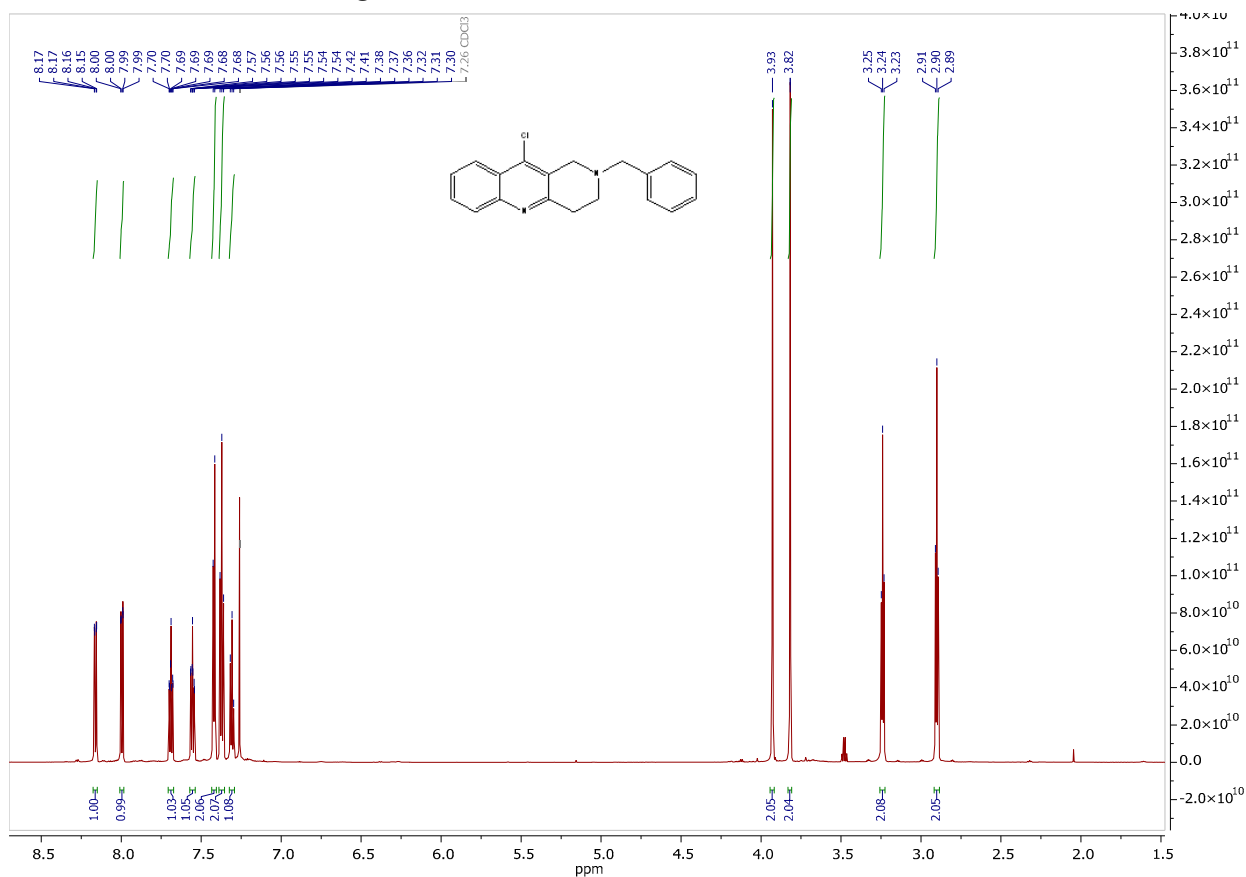

**Figure S2.** The  $^{13}\text{C}$  NMR data of **3a**

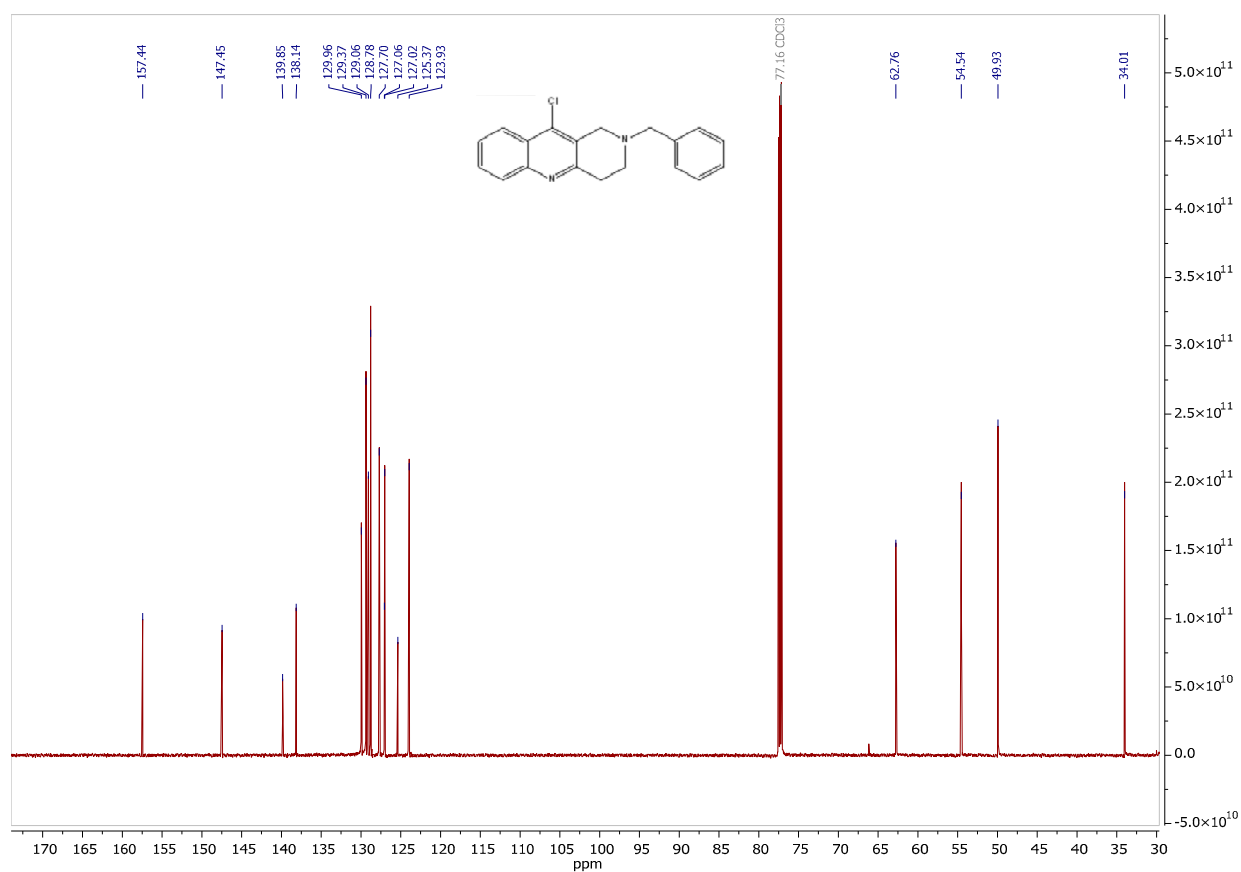

**Figure S3.** The  $^1\text{H}$  NMR data of **3b**

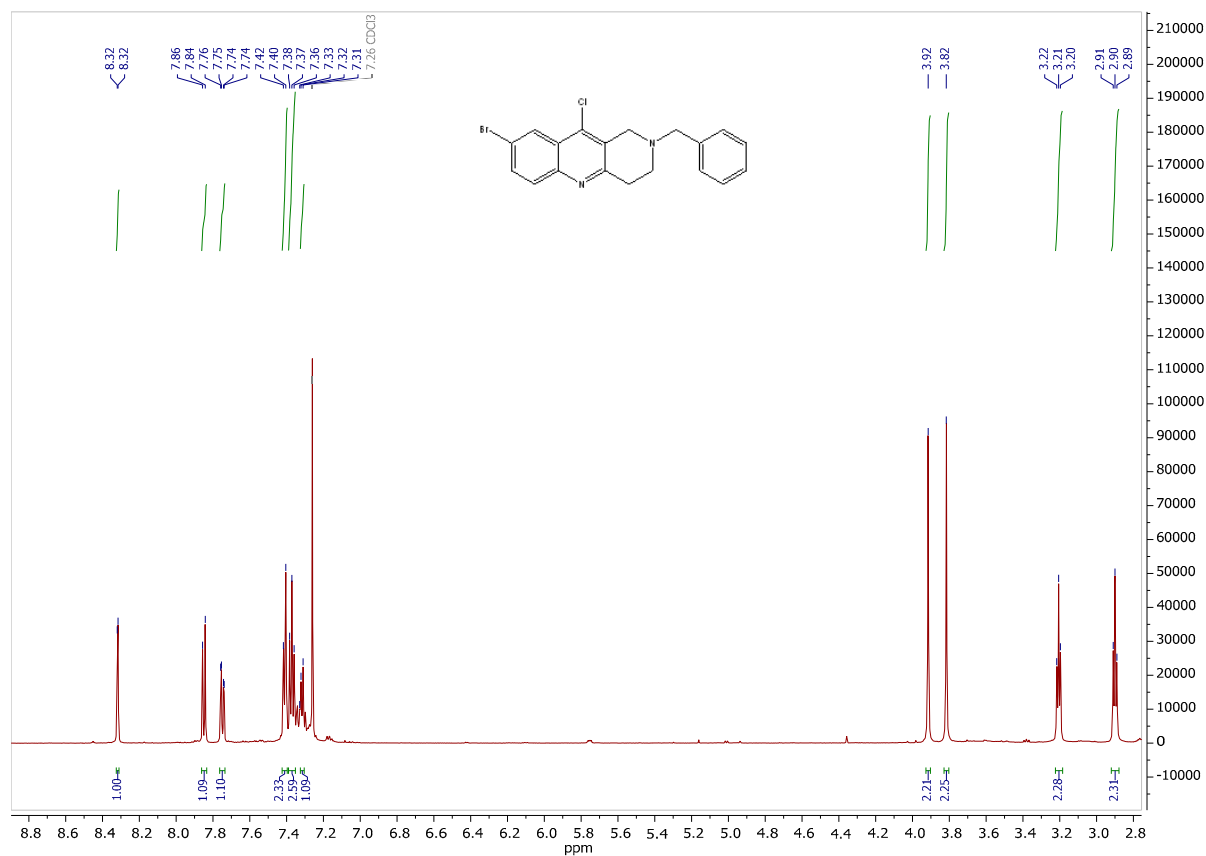

**Figure S4.** The  $^{13}\text{C}$  NMR data of **3b**

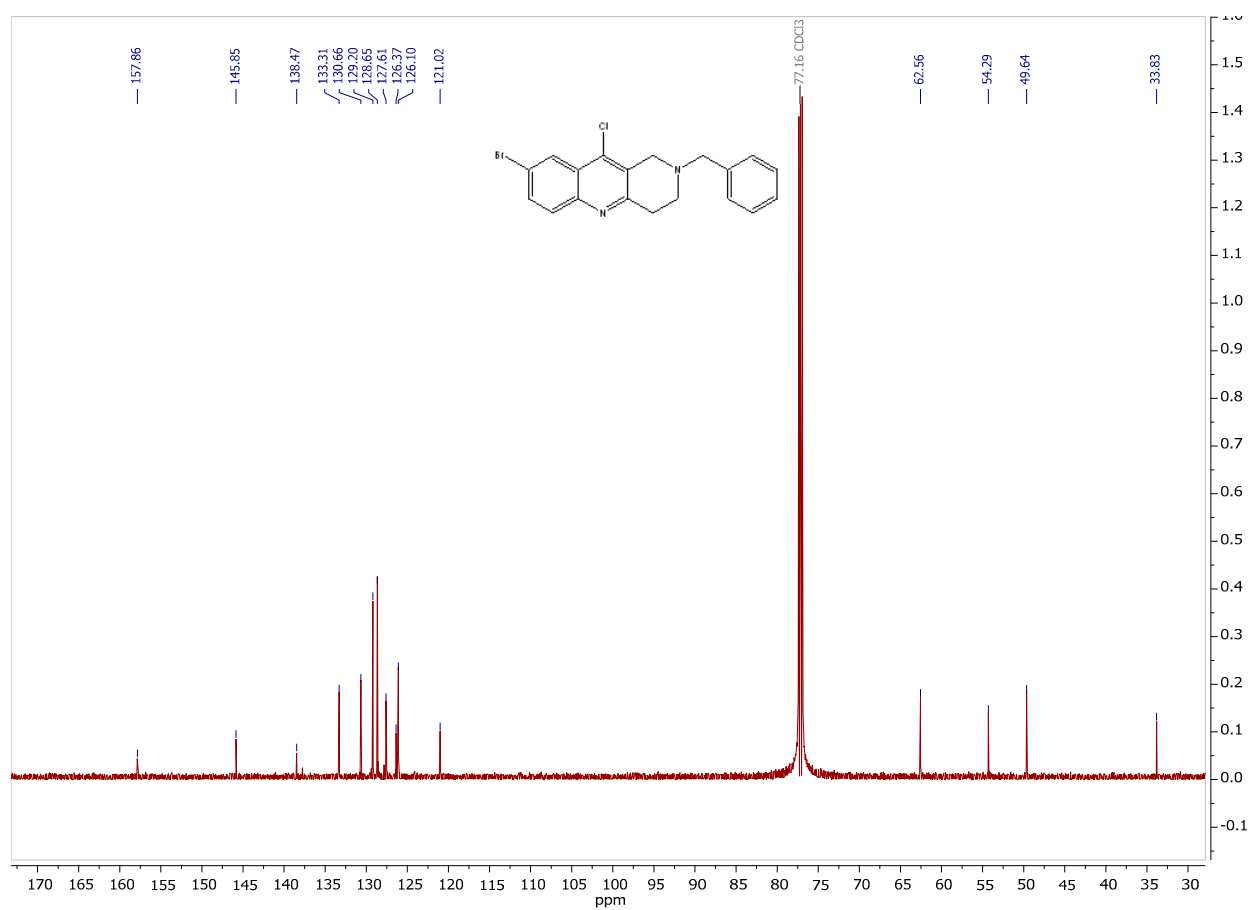

**Figure S5.** The  $^1\text{H}$  NMR data of **3c**

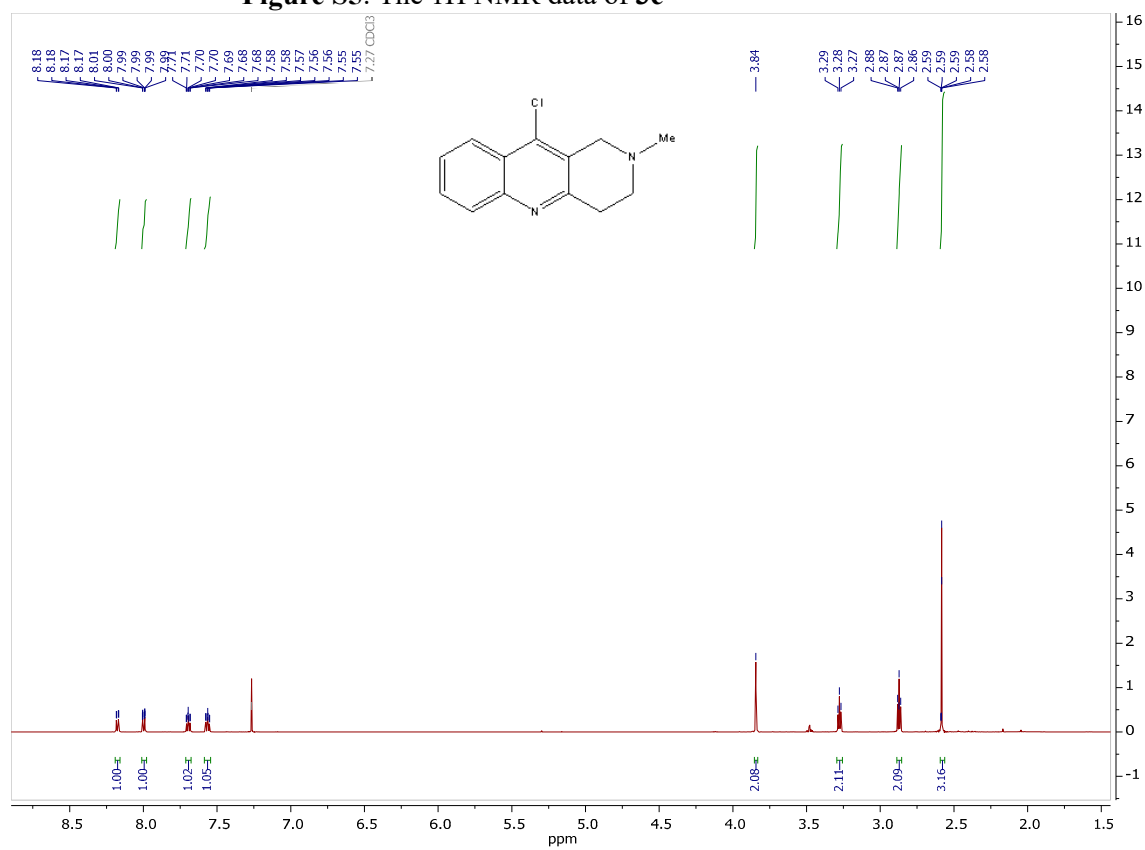

**Figure S6.** The  $^{13}\text{C}$  NMR data of **3c**

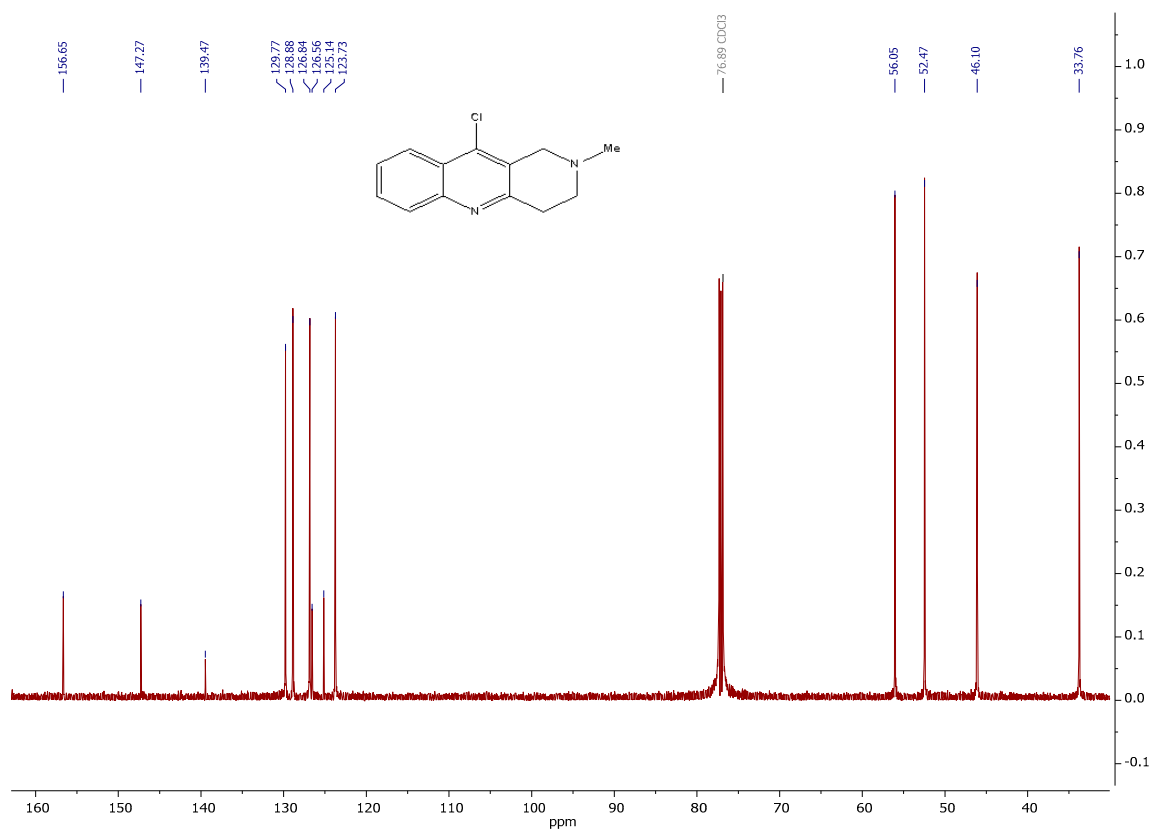

**Figure S7.** The  $^1\text{H}$  NMR data of **3d**

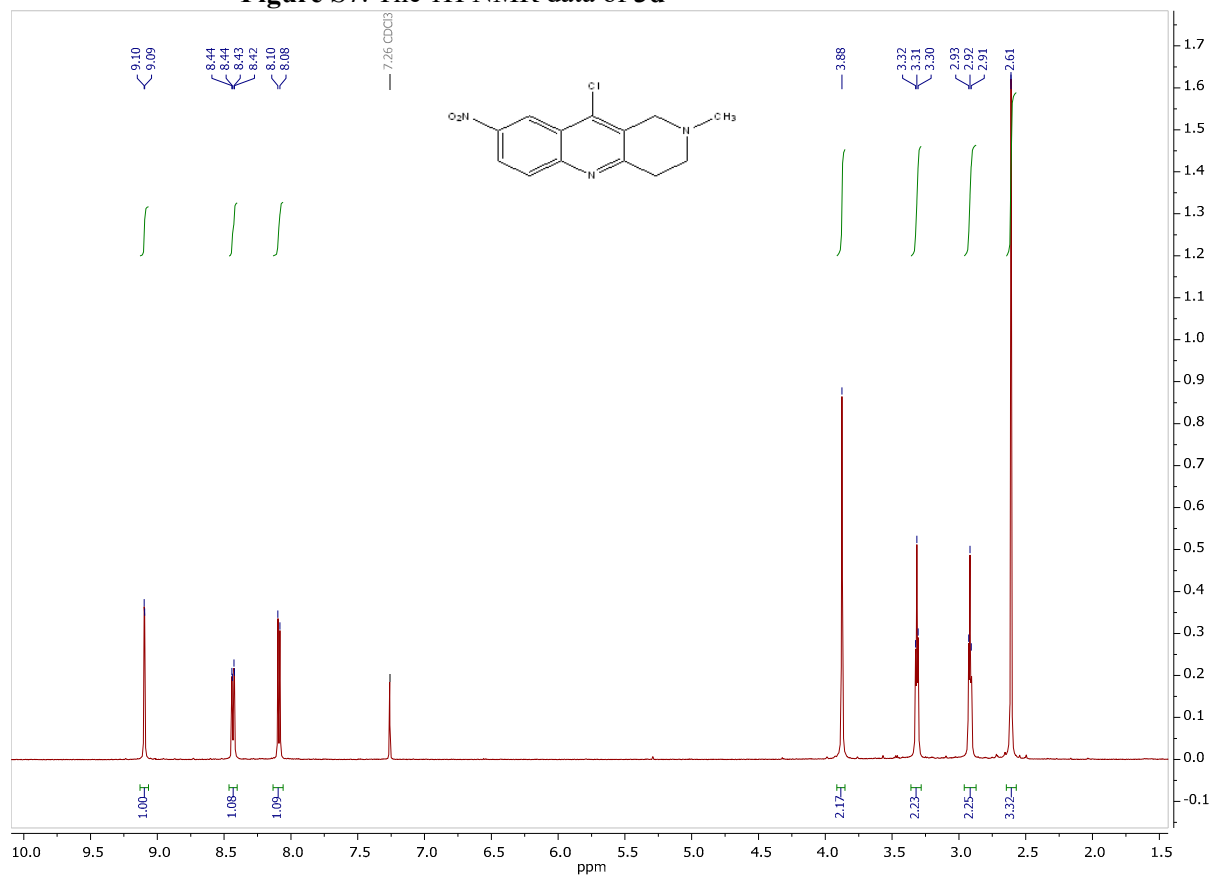

**Figure S8.** The  $^{13}\text{C}$  NMR data of **3d**

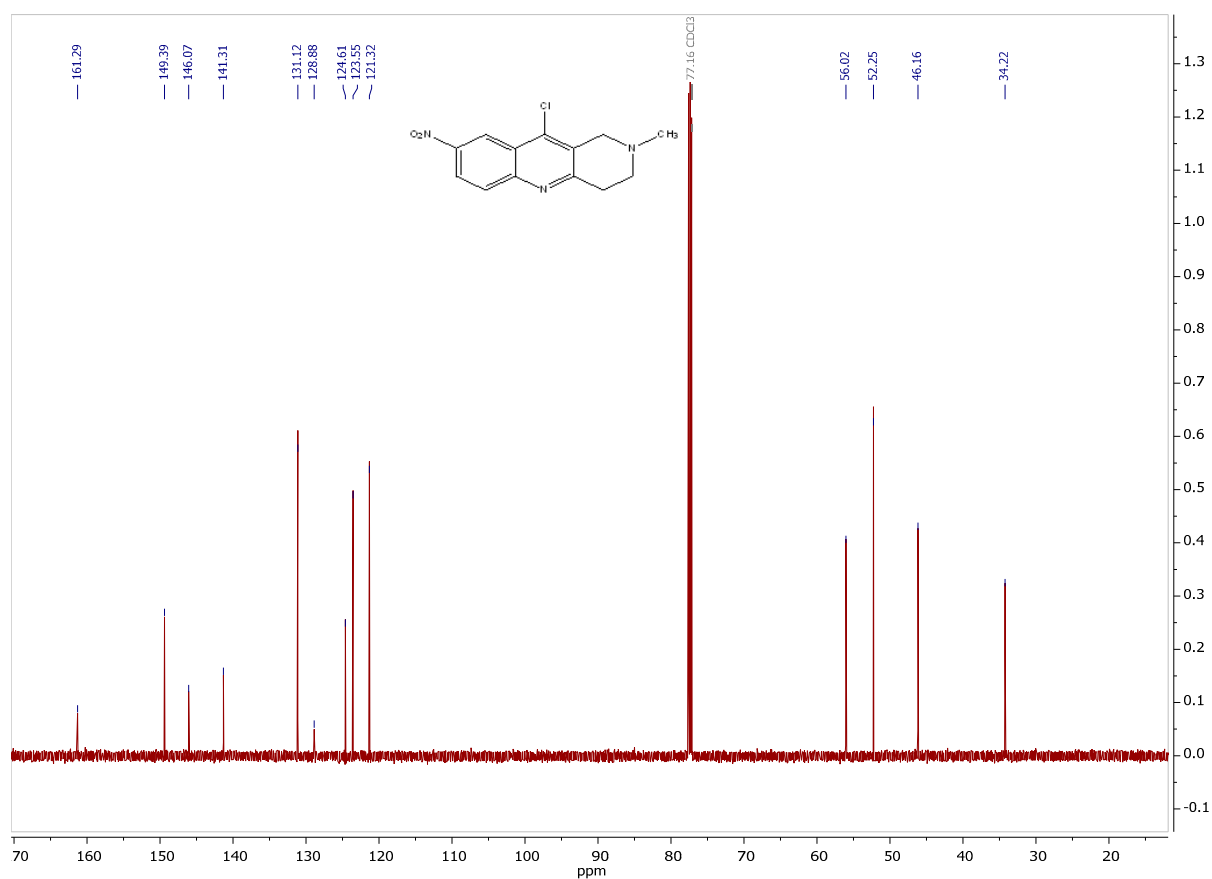

**Figure S9.** The  $^1\text{H}$  NMR data of **4a**

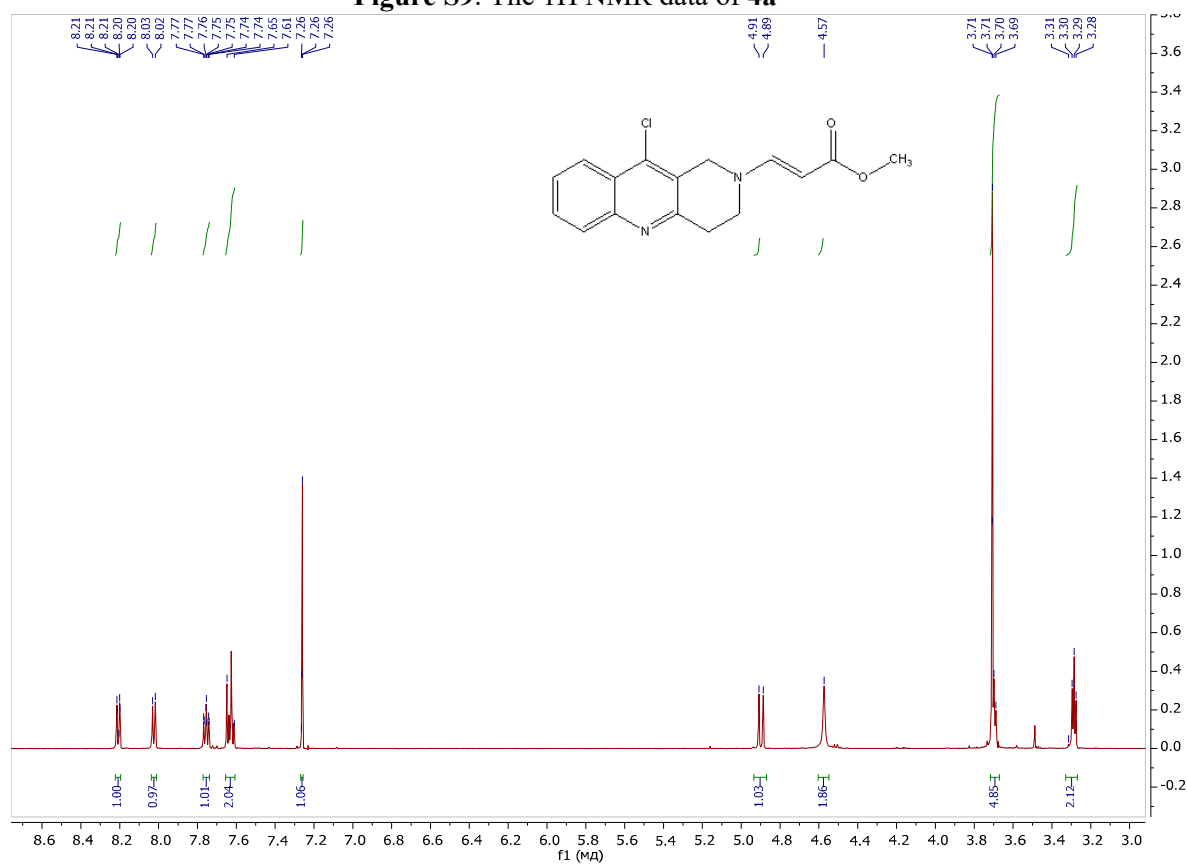

**Figure S10.** The <sup>13</sup>C NMR data of **4a**

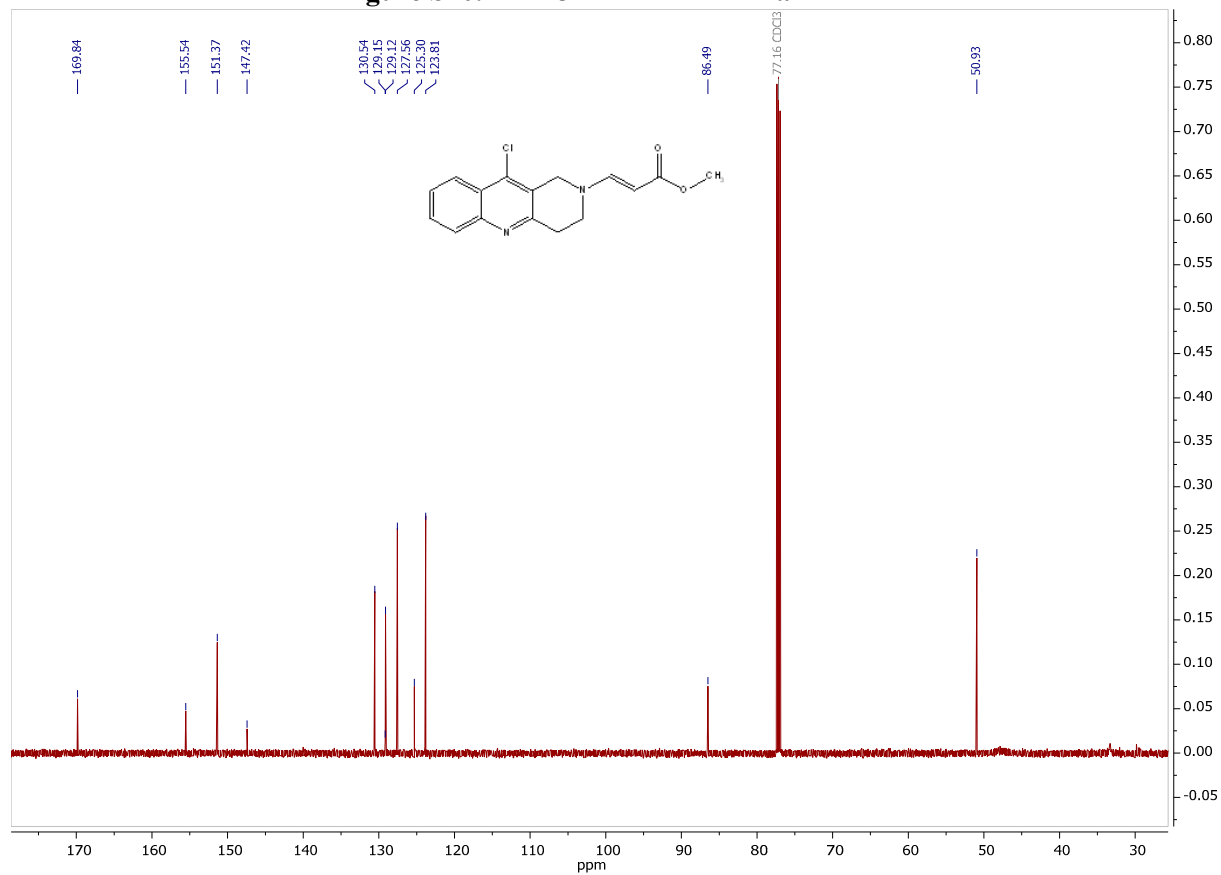

**Figure S11.** The <sup>1</sup>H NMR data of **4b**

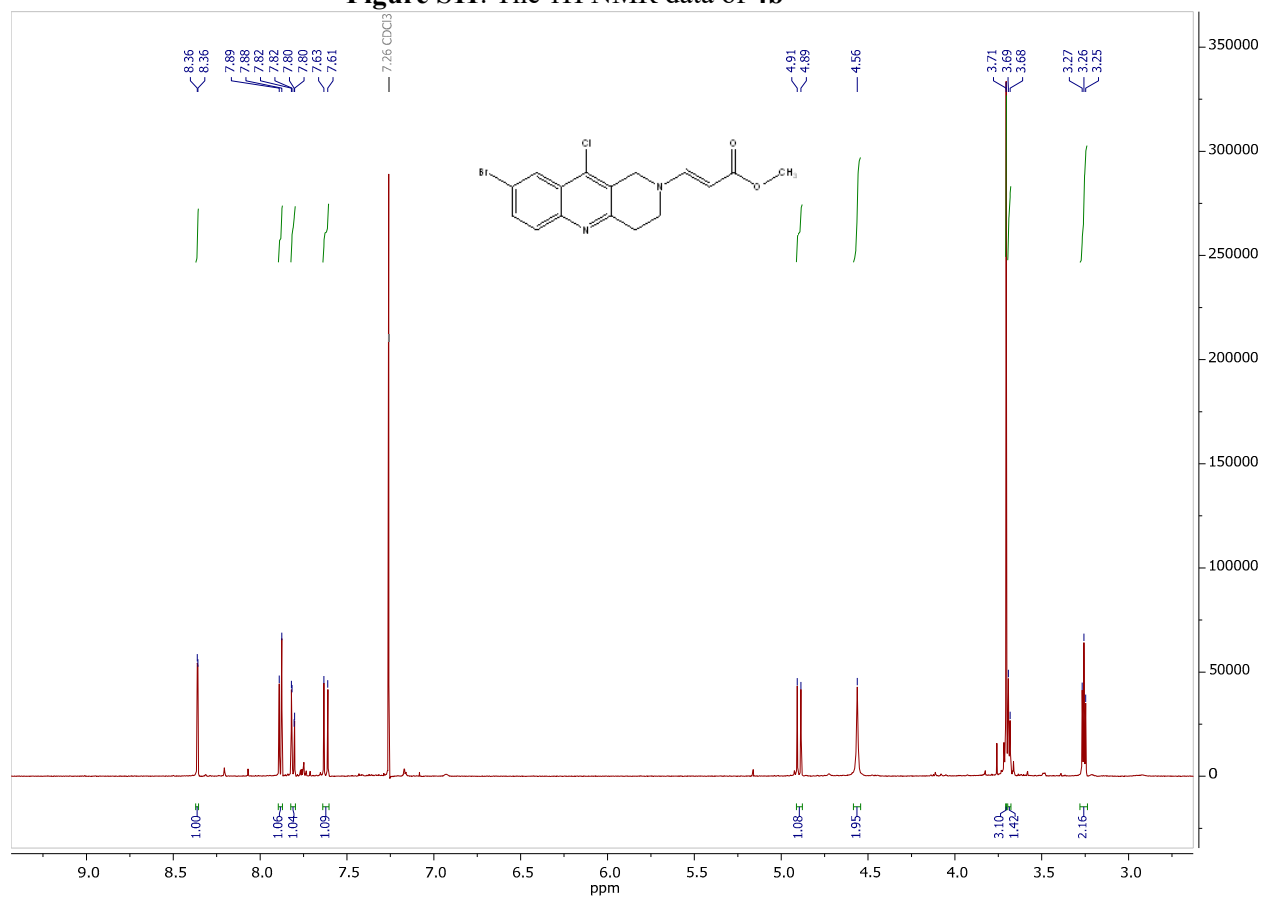

**Figure S12.** The  $^{13}\text{C}$  NMR data of **4b**

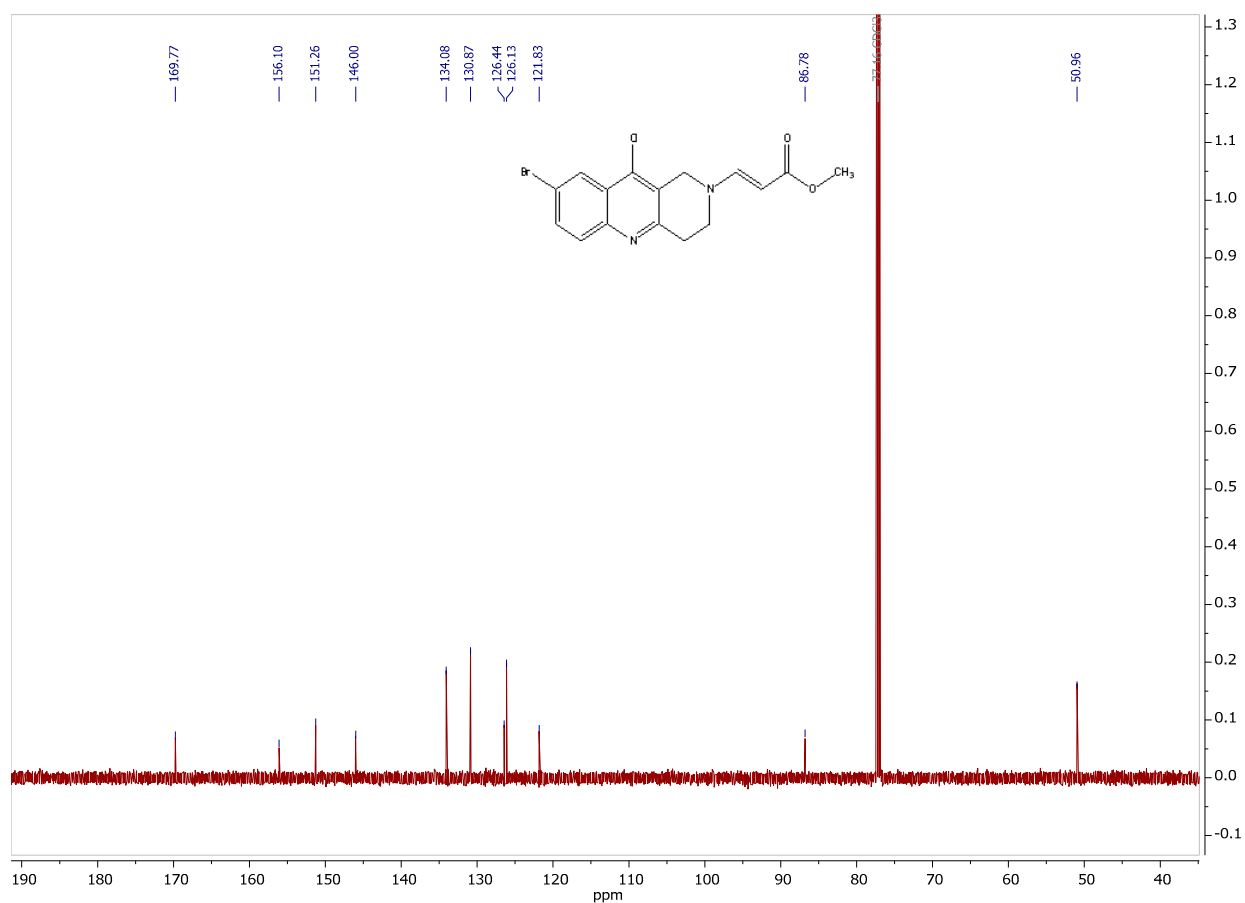

**Figure S13.** The  $^1\text{H}$  NMR data of **4c**

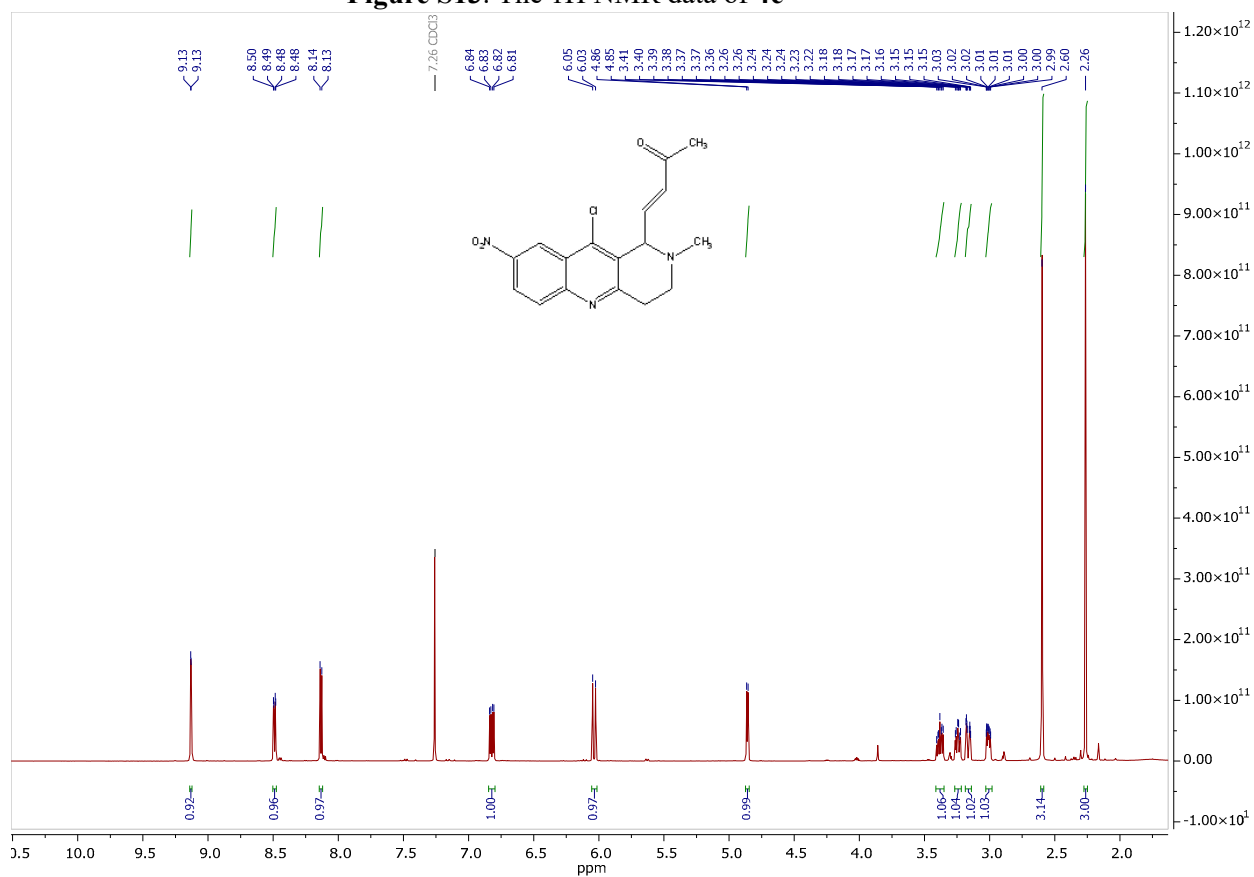

**Figure S14.** The  $^{13}\text{C}$  NMR data of **4c**

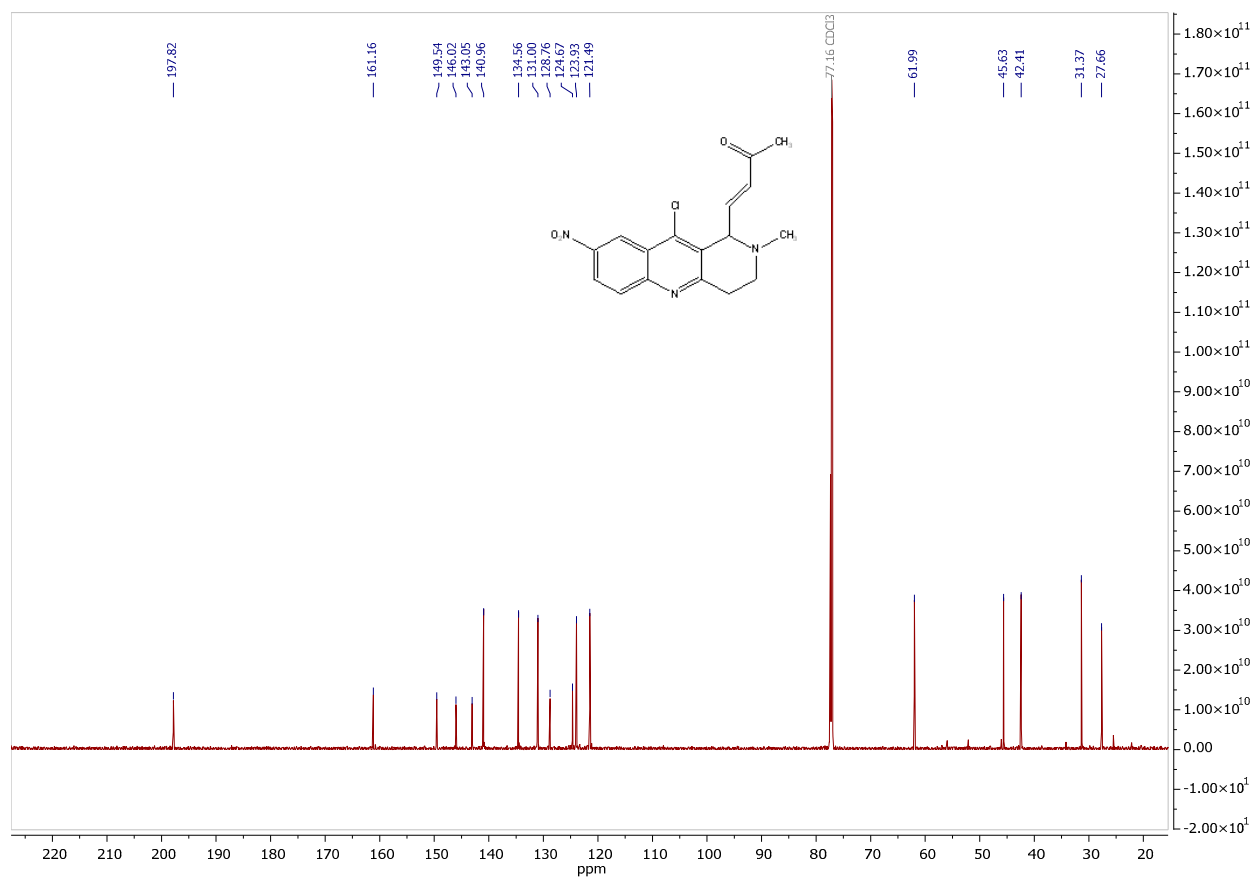

**Figure S15.** The  $^1\text{H}$  NMR data of **5a**

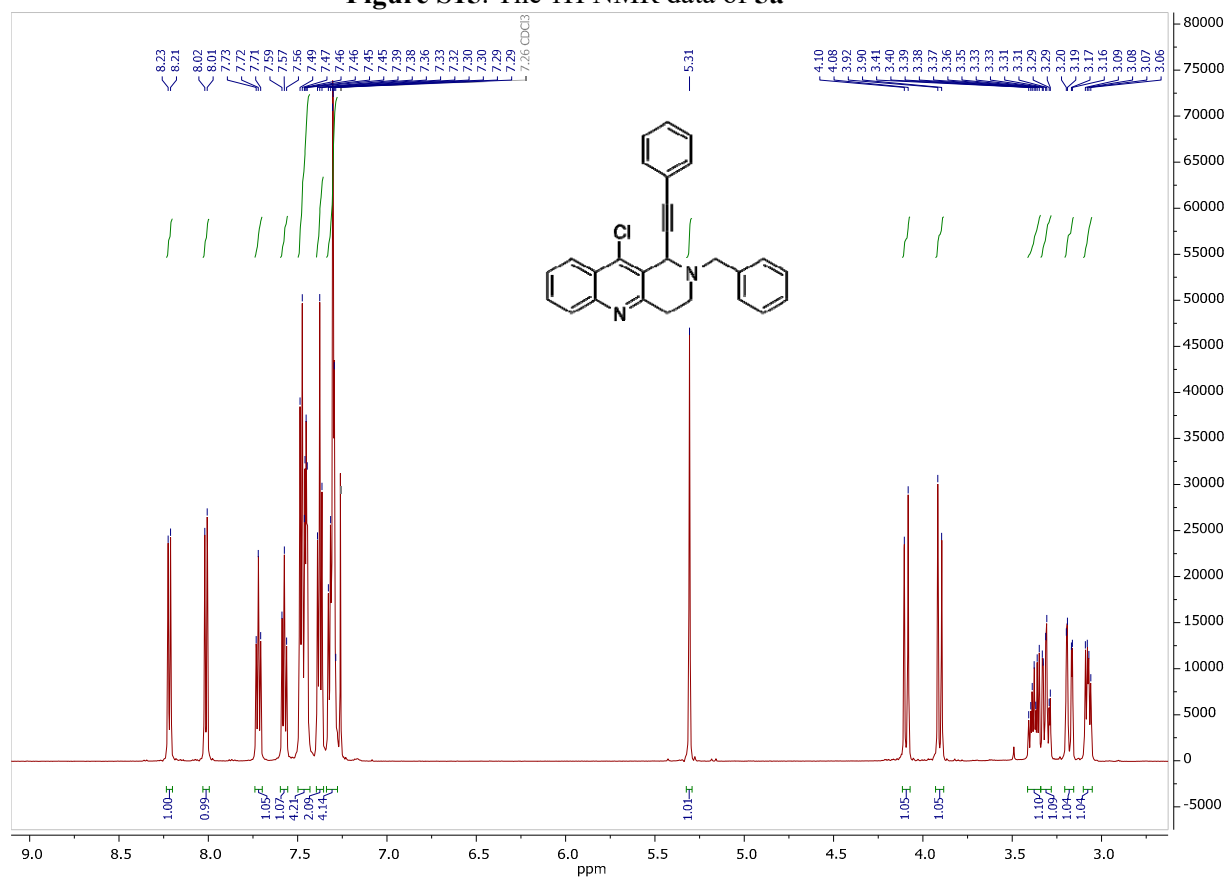



**Figure S16.** The  $^{13}\text{C}$  NMR data of **5a**

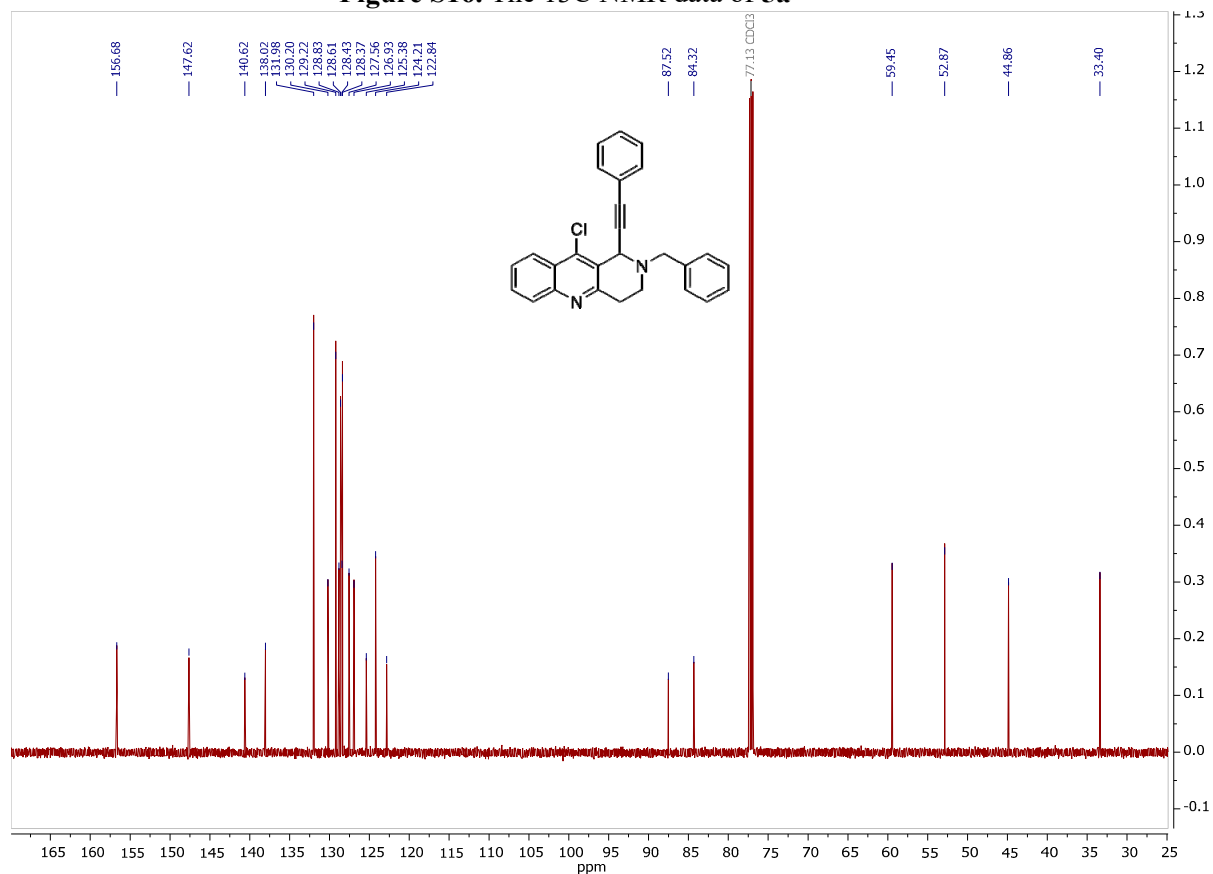

**Figure S17.** The  $^1\text{H}$  NMR data of **5b**

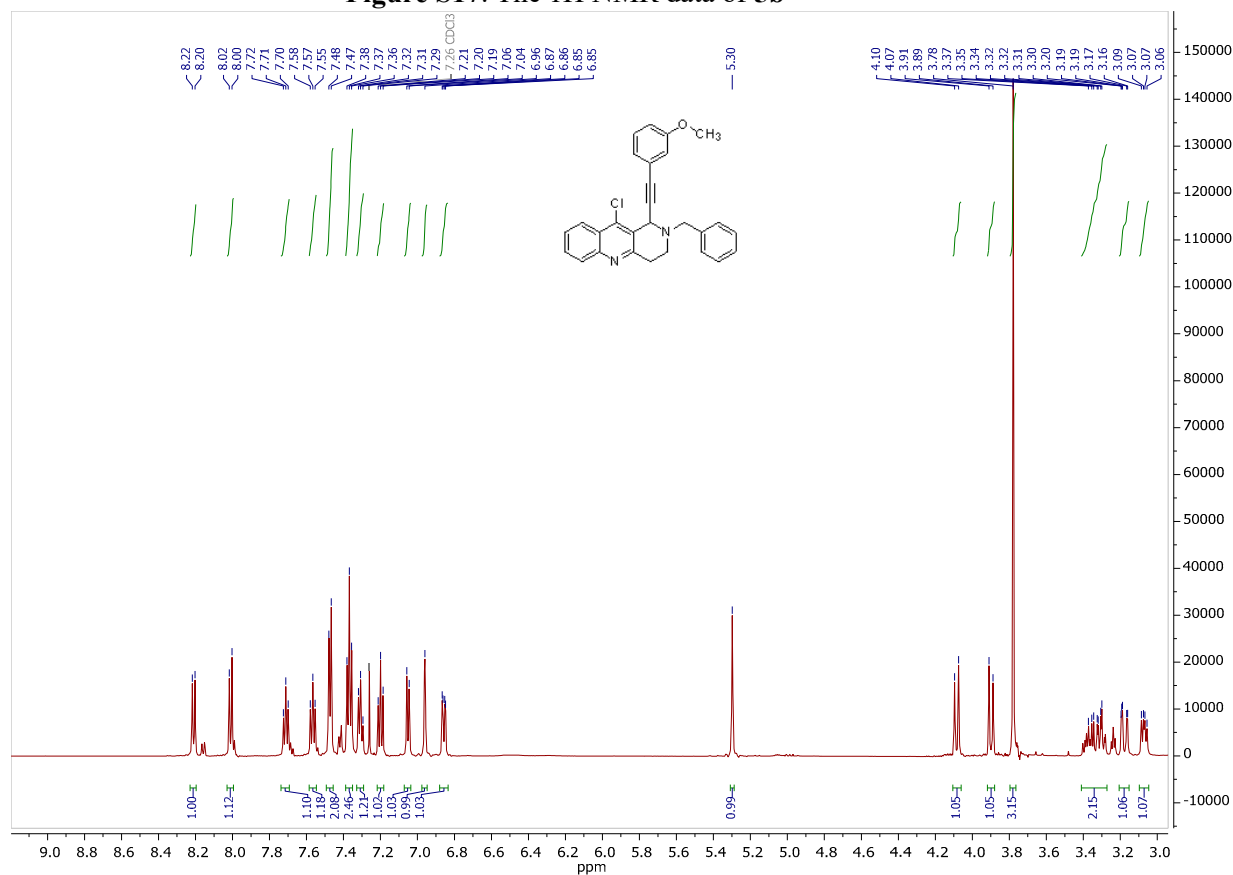

**Figure S18.** The  $^{13}\text{C}$  NMR data of **5b**

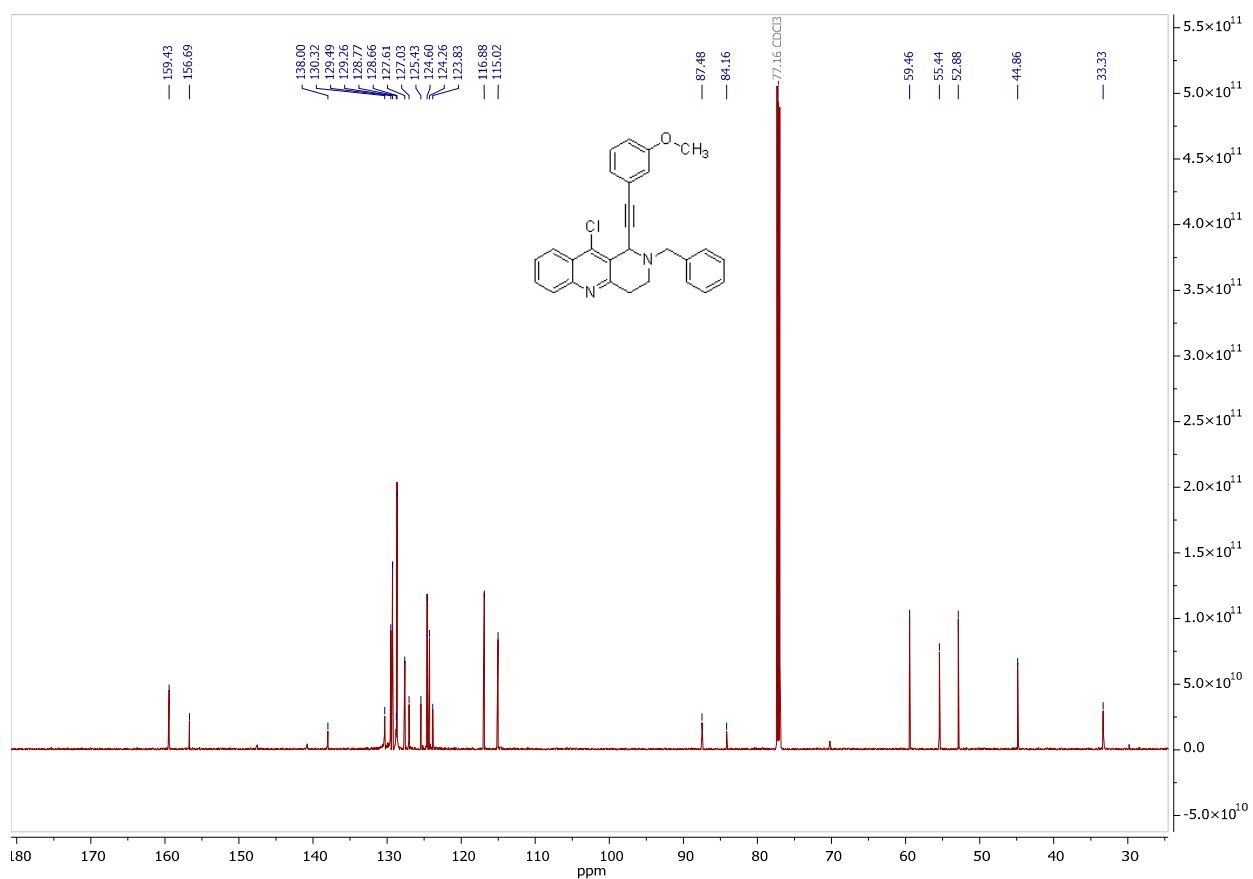

**Figure S19.** The  $^1\text{H}$  NMR data of **5c**

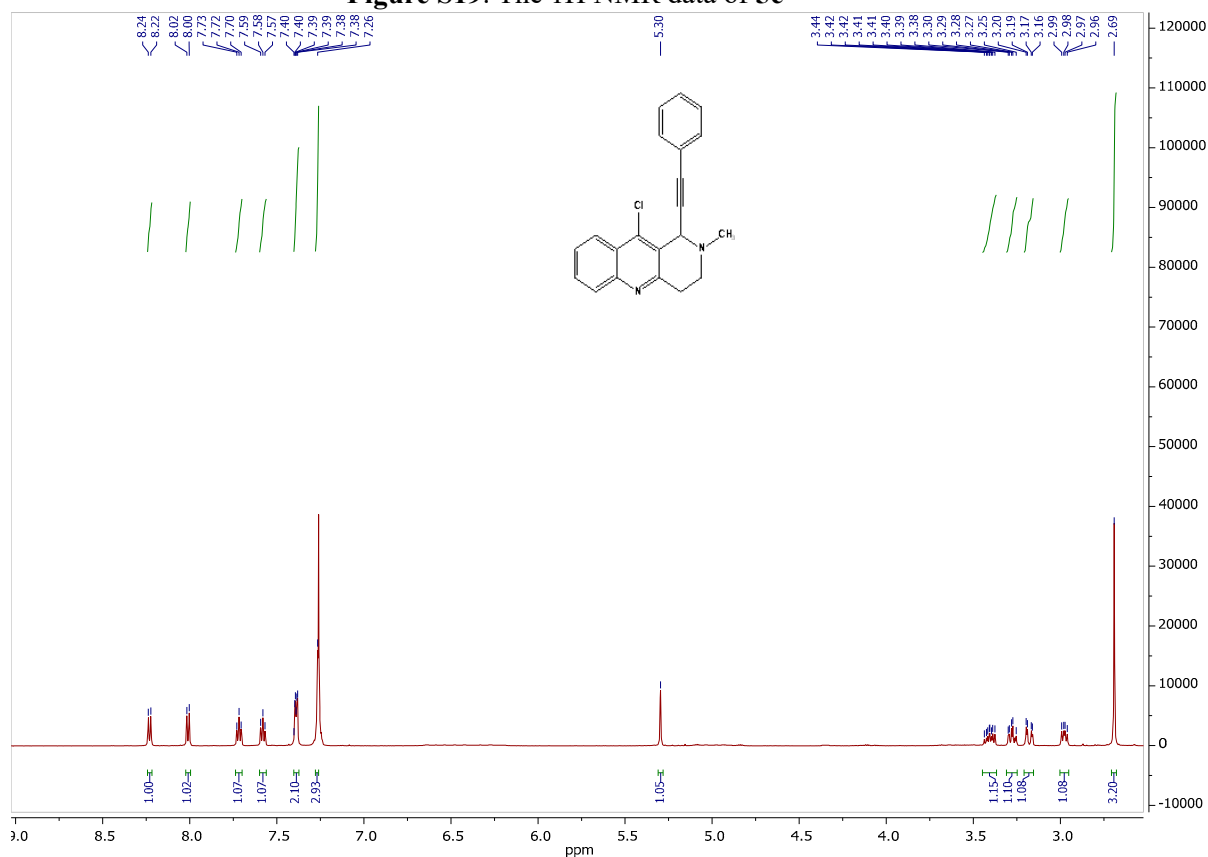

Figure S20. The  $^1\text{H}$  NMR data of **5d**

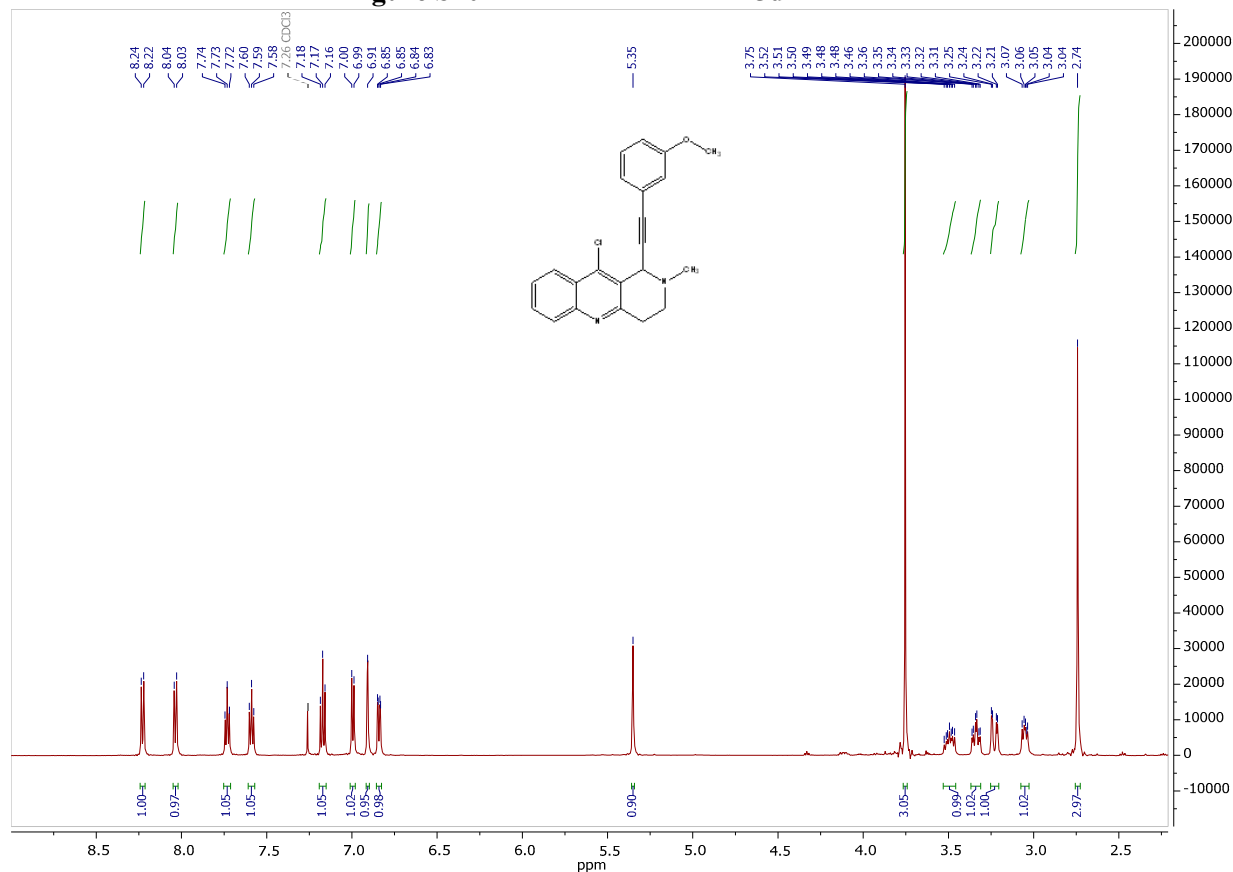

Figure S21. The  $^{13}\text{C}$  NMR data of **5d**

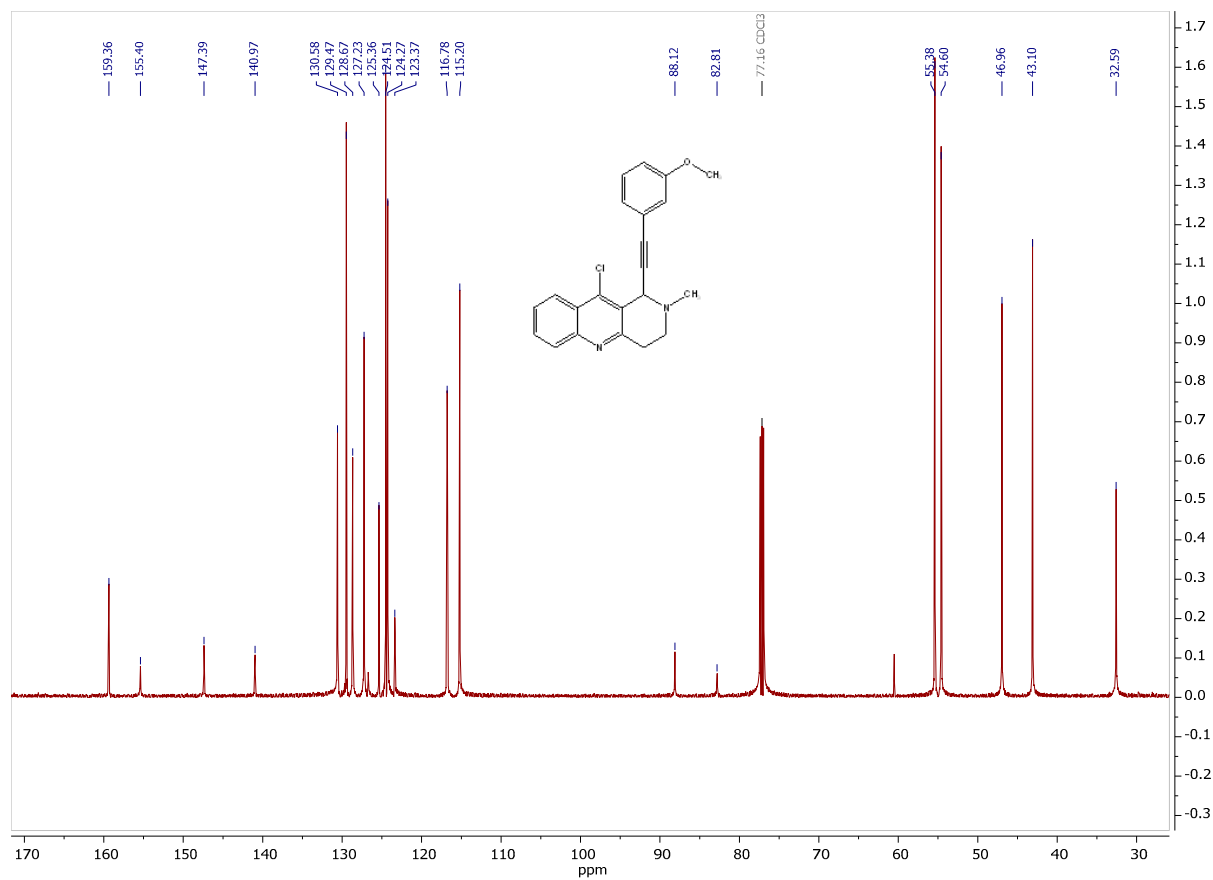

**Figure S22.** The  $^1\text{H}$  NMR data of **5e**

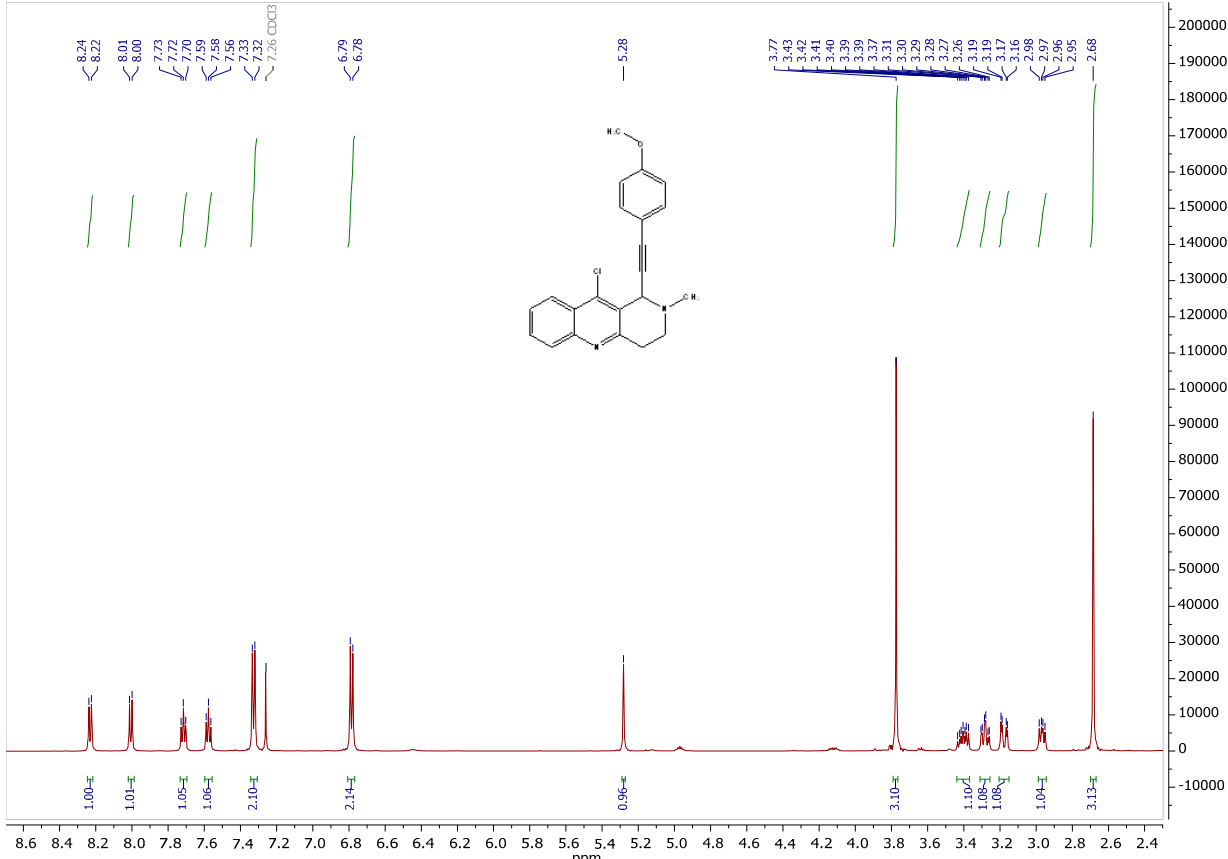

**Figure S23.** The  $^{13}\text{C}$  NMR data of **5e**

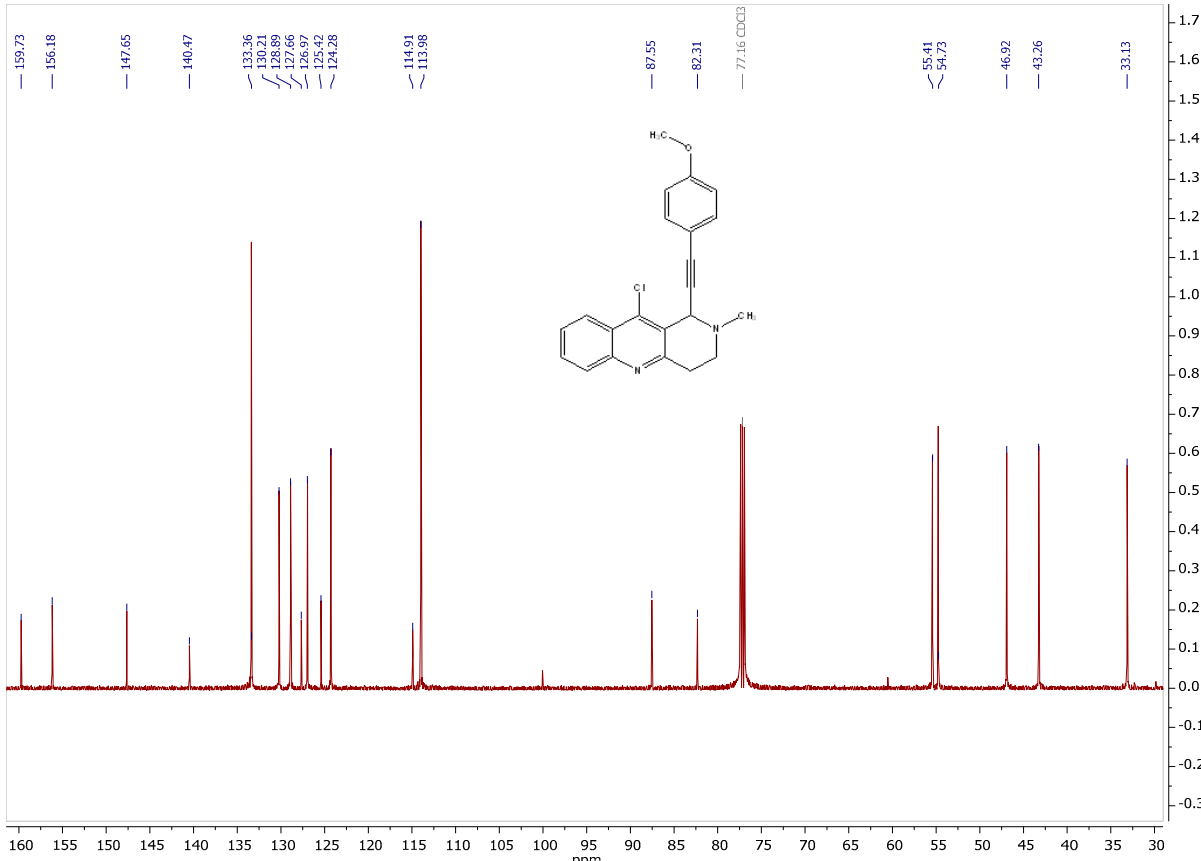

**Figure S24. The  $^1\text{H}$  NMR data of **5f****

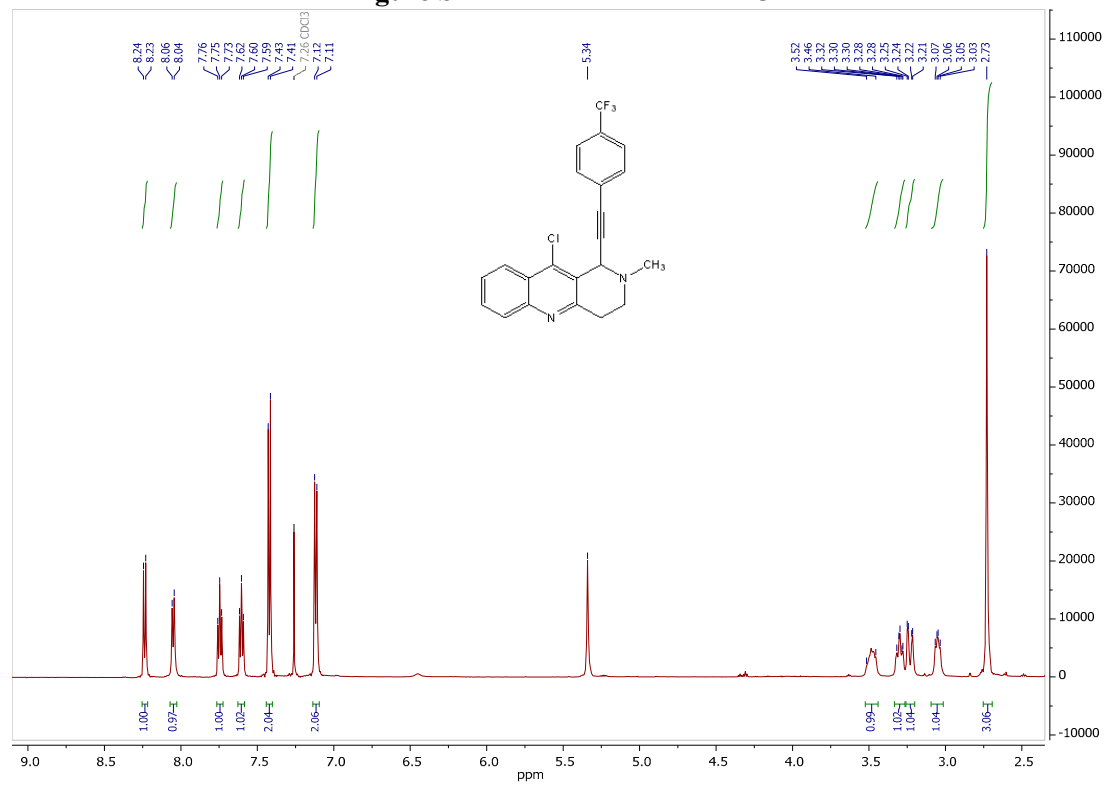

**Figure S25. The  $^{13}\text{C}$  NMR data of **5f****

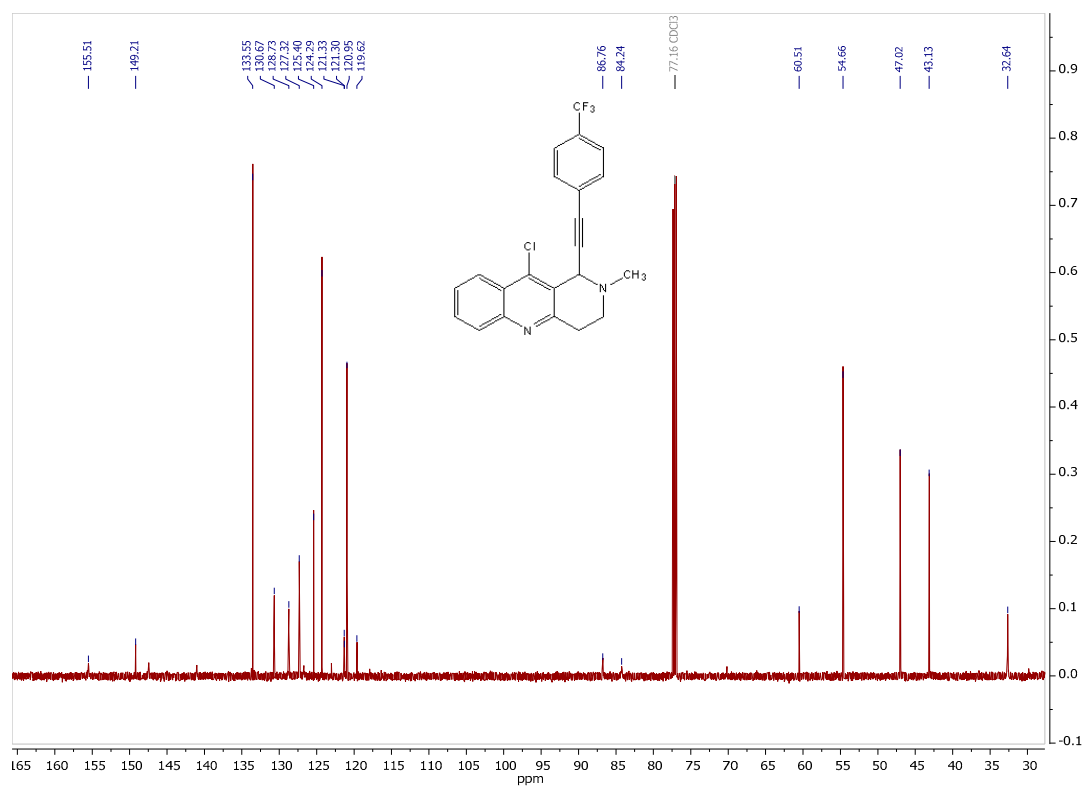

Figure S26. The  $^1\text{H}$  NMR data of **5g**

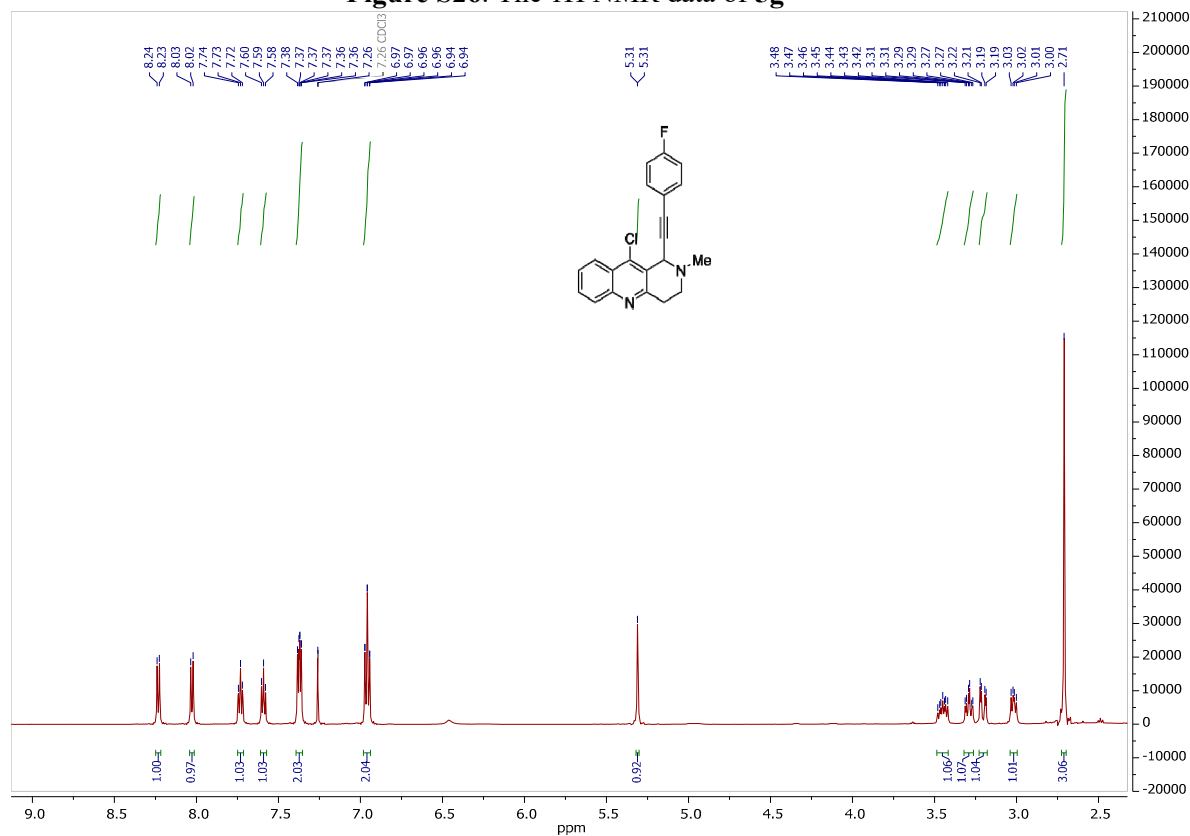

Figure S27. The  $^{13}\text{C}$  NMR data of **5g**

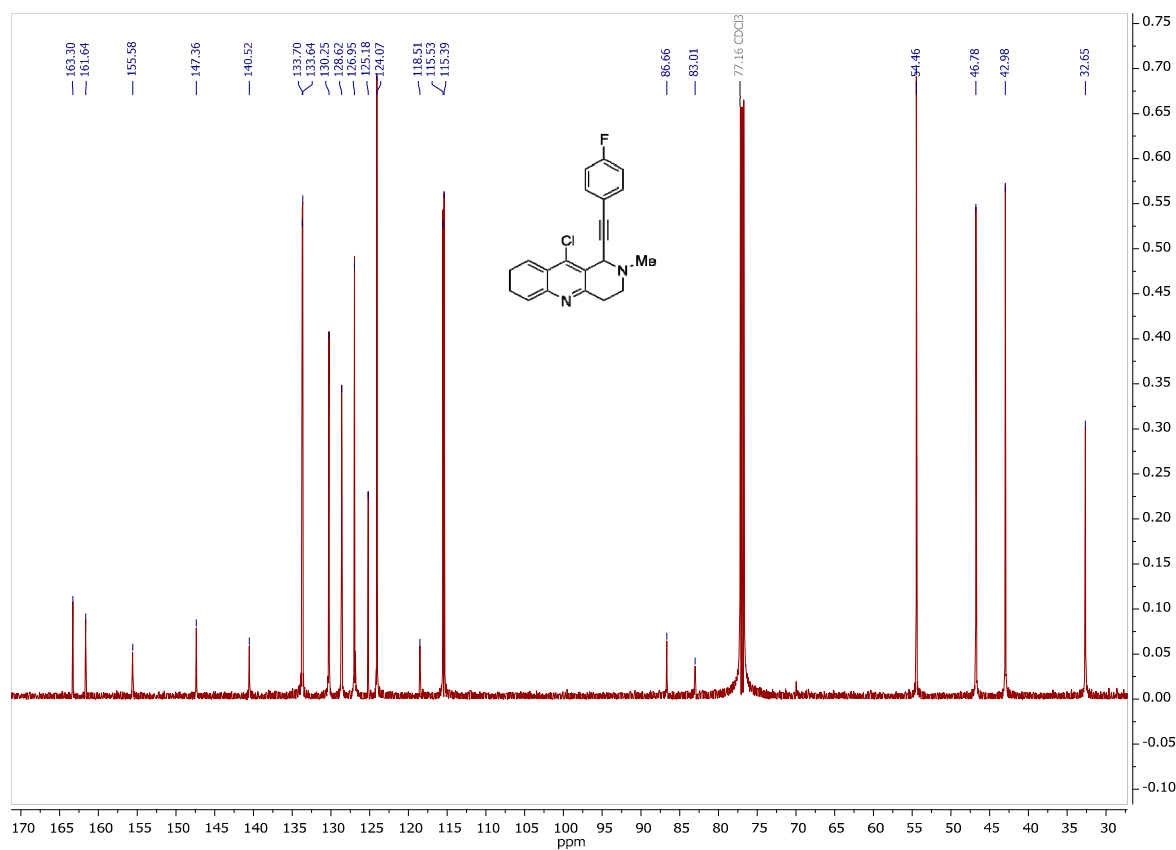

**Figure S28.** The  $^1\text{H}$  NMR data of **5h**

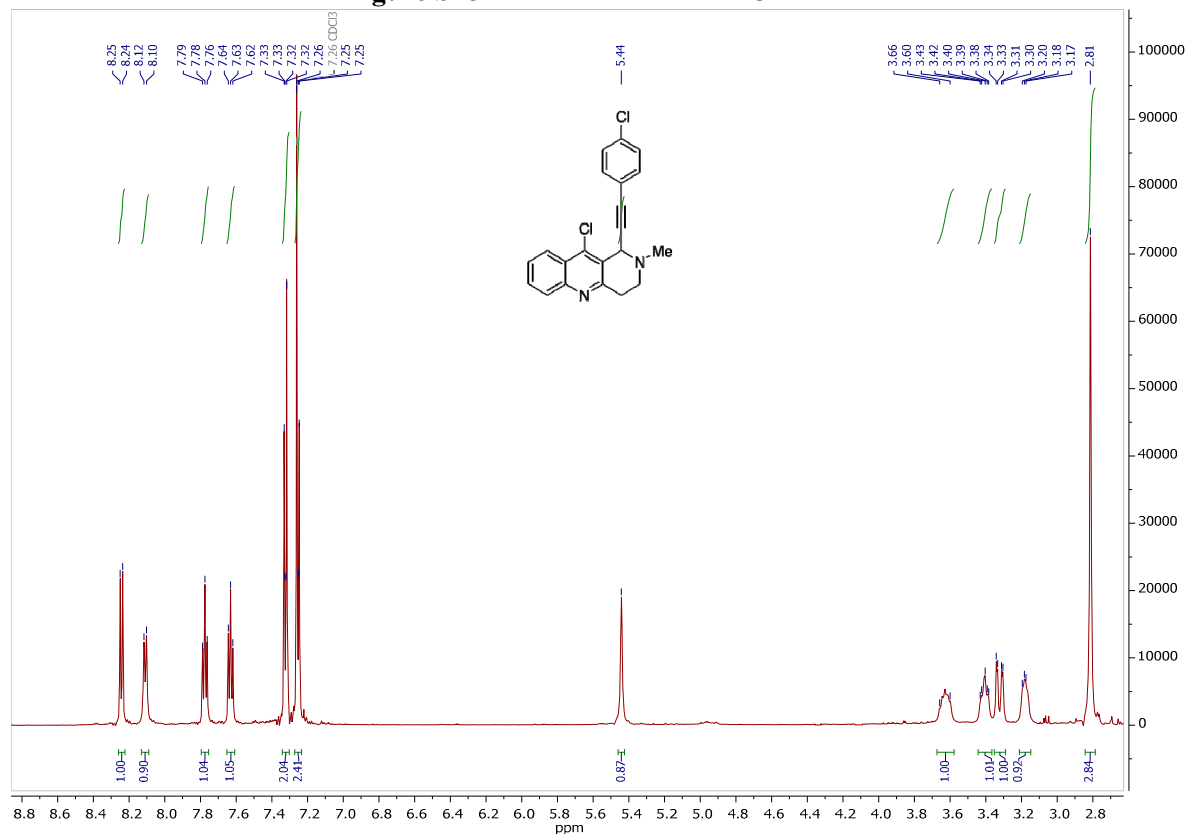

**Figure S29.** The  $^1\text{H}$  NMR data of **6a**

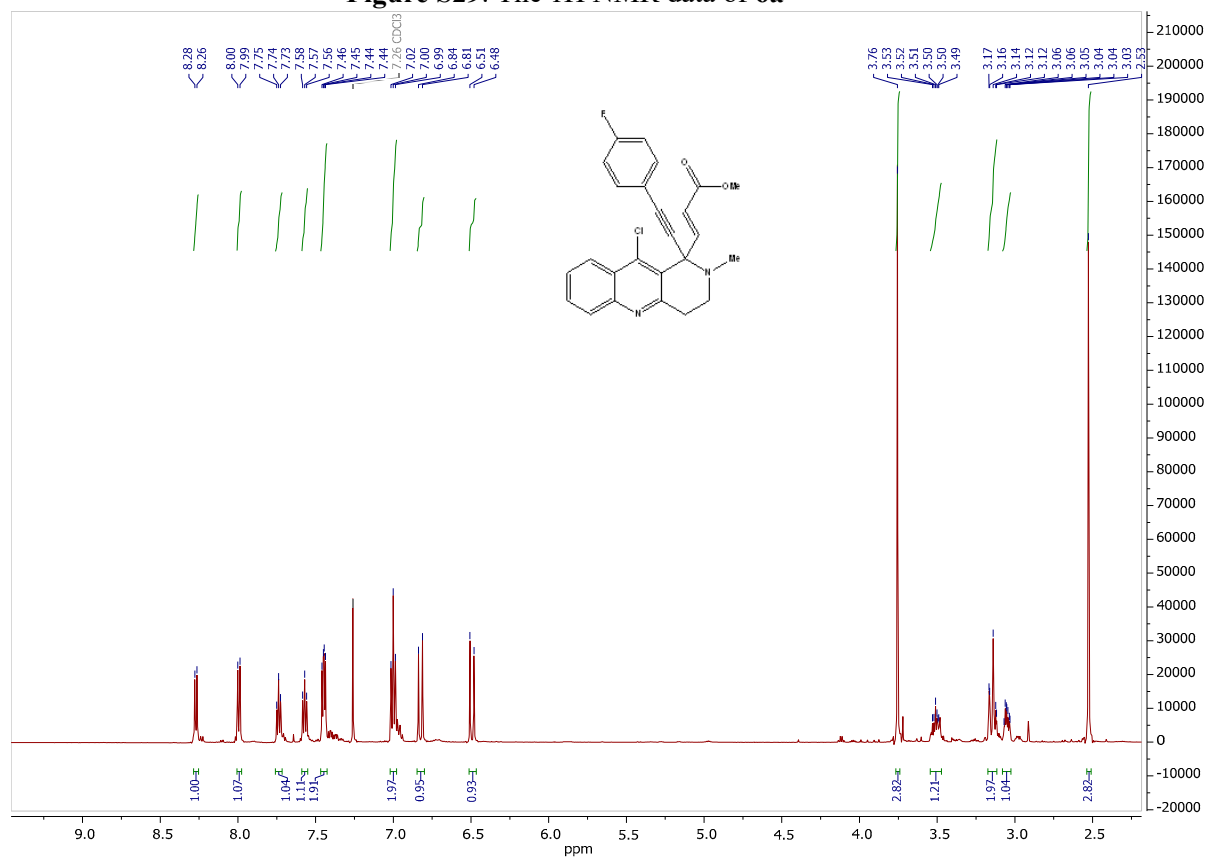

**Figure S30.** The  $^{13}\text{C}$  NMR data of **6a**

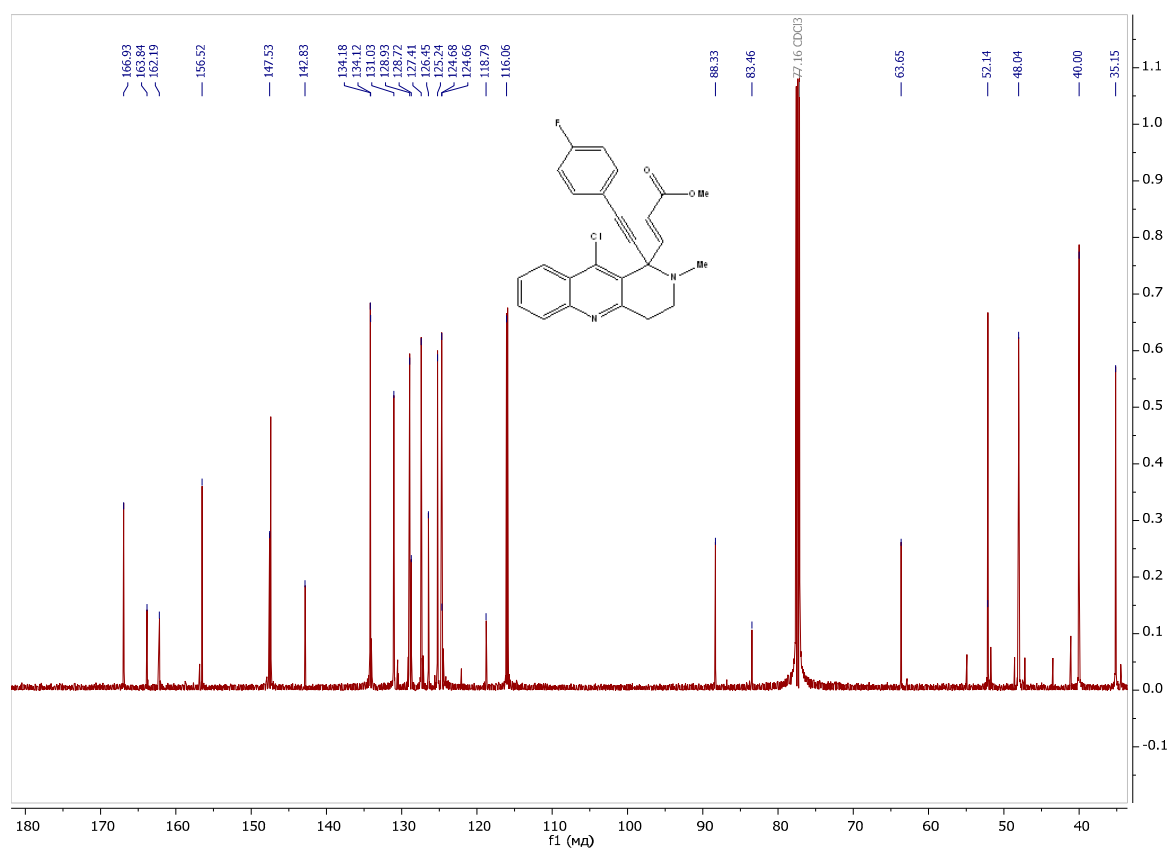

**Figure S31.** The  $^1\text{H}$  NMR data of **6b**

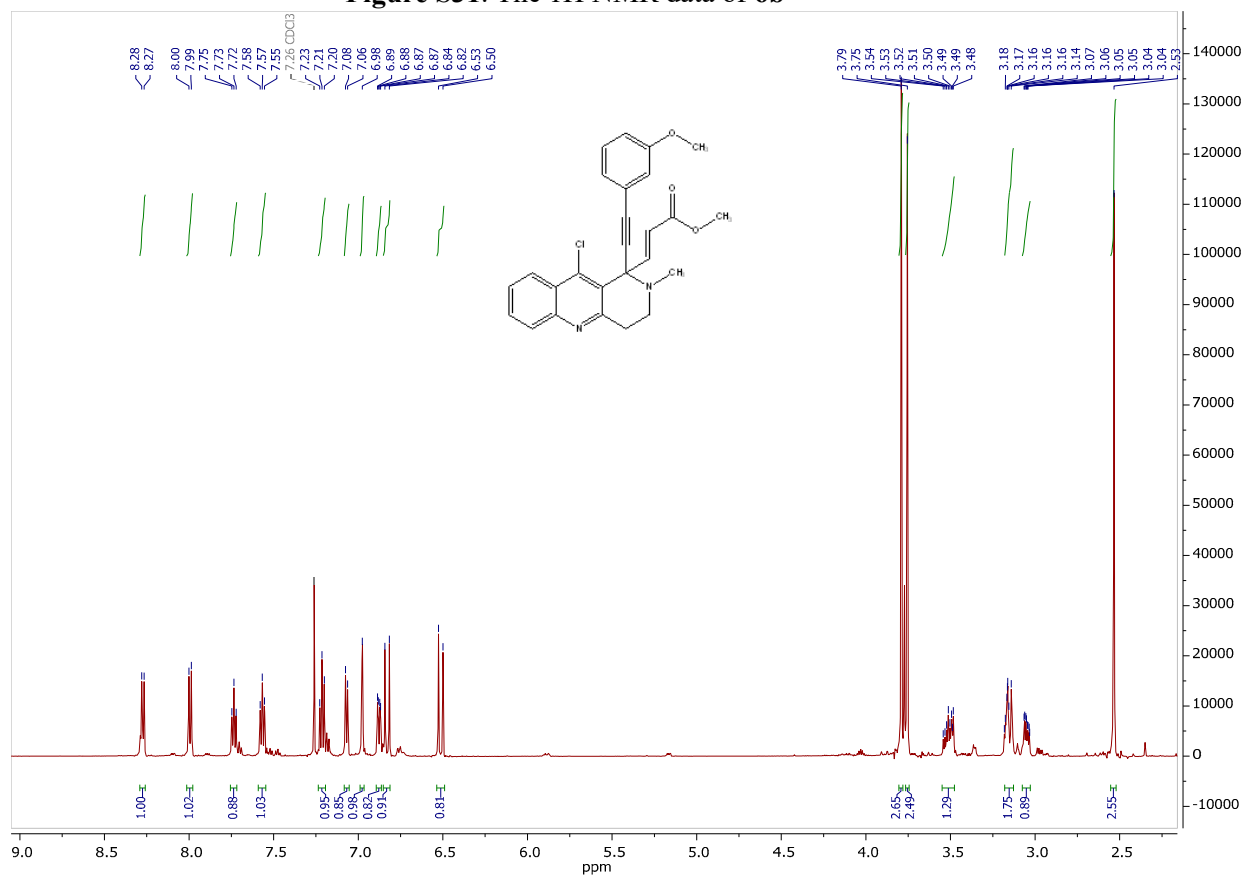



**Figure S32.** The  $^{13}\text{C}$  NMR data of **6b**

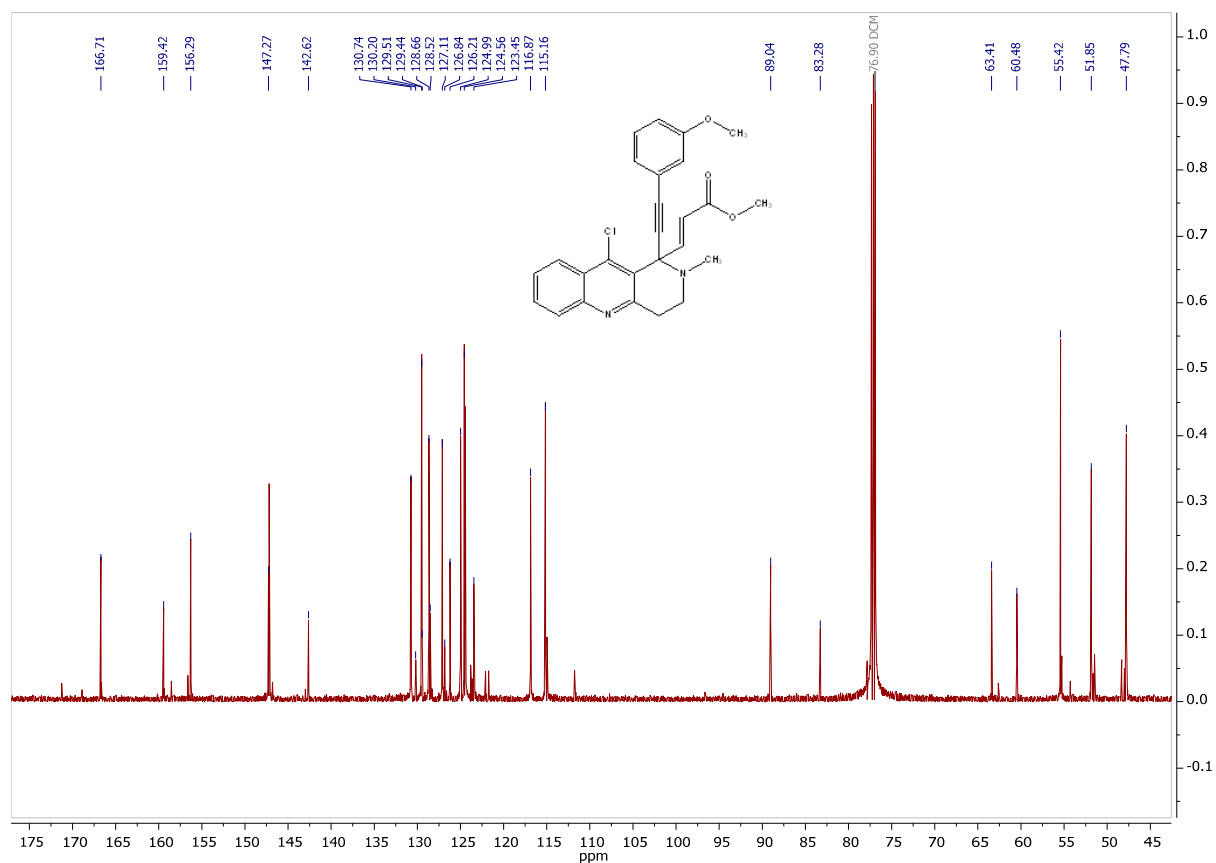

**Figure S33.** The  $^1\text{H}$  NMR data of **6c**

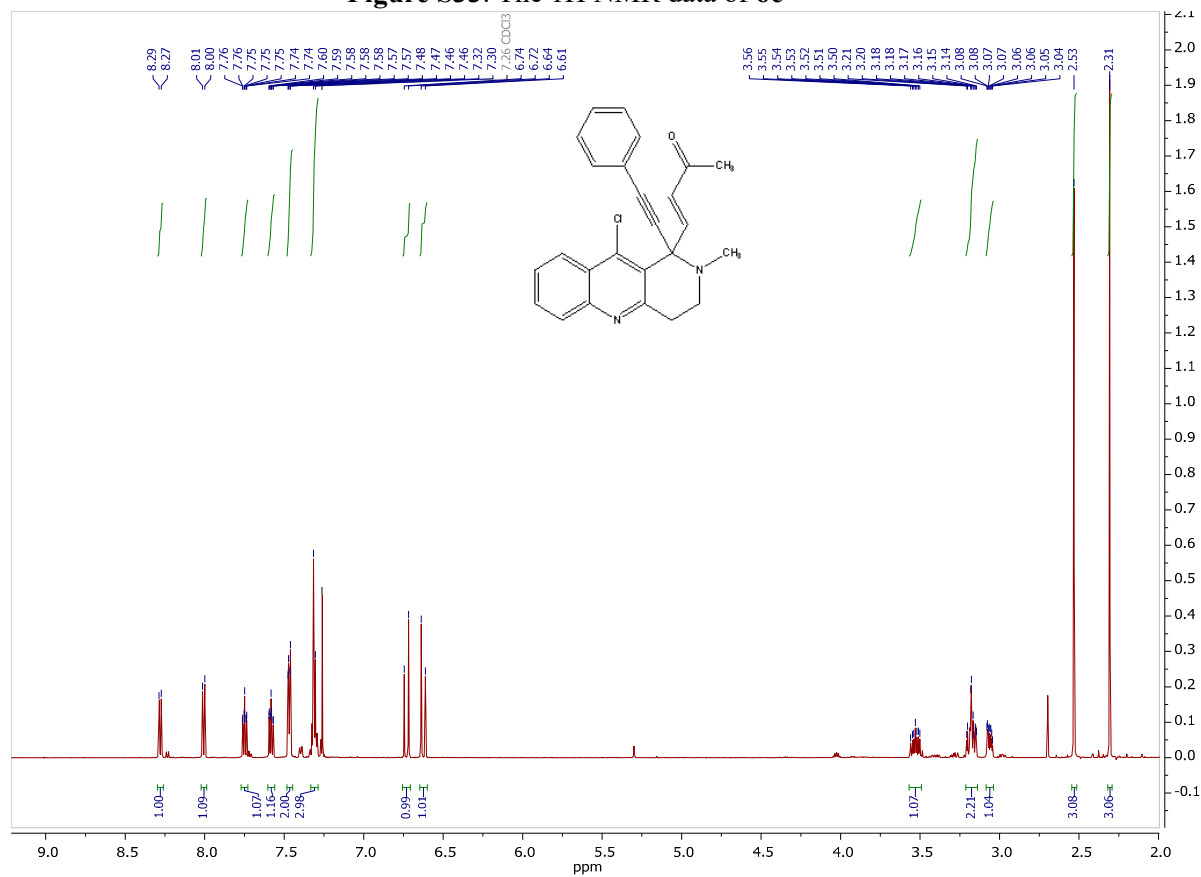

**Figure S34.** The  $^{13}\text{C}$  NMR data of **6c**

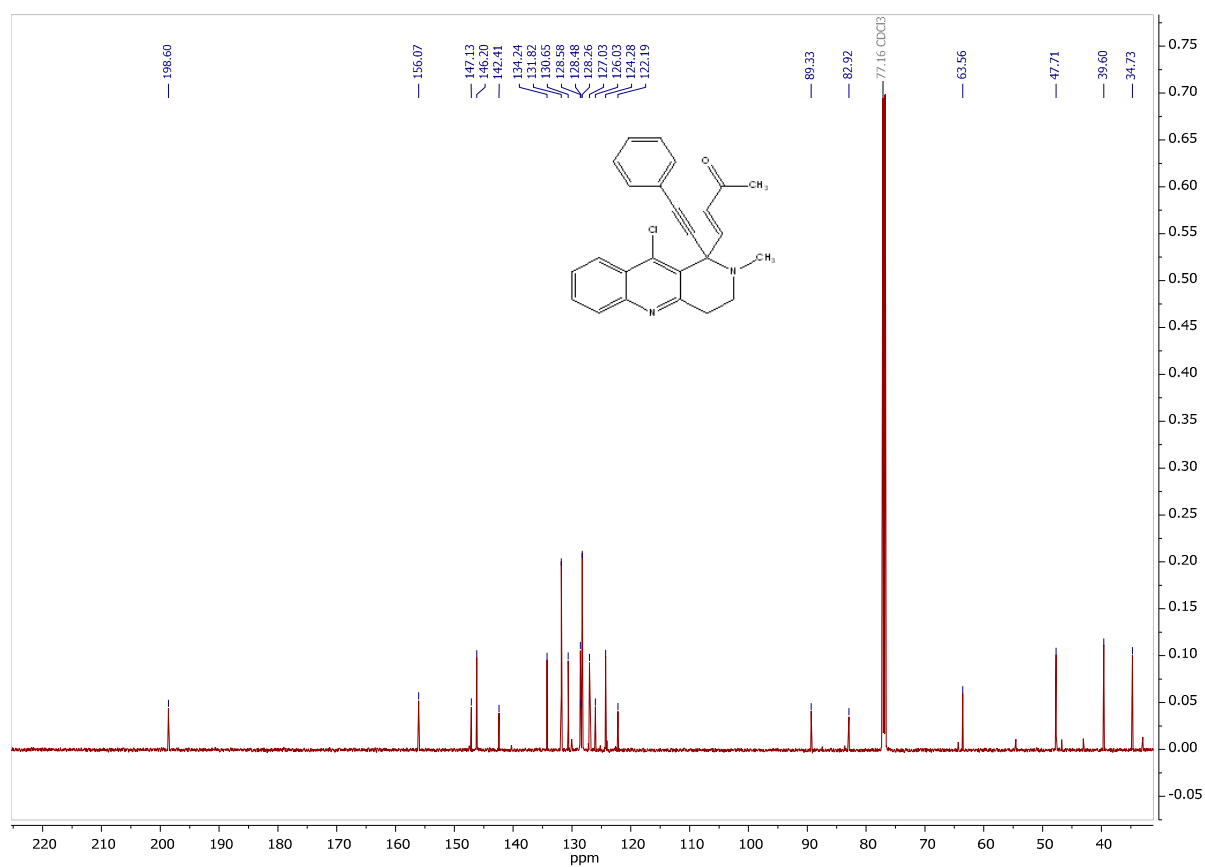

**Figure S35.** The  $^1\text{H}$  NMR data of **6d**

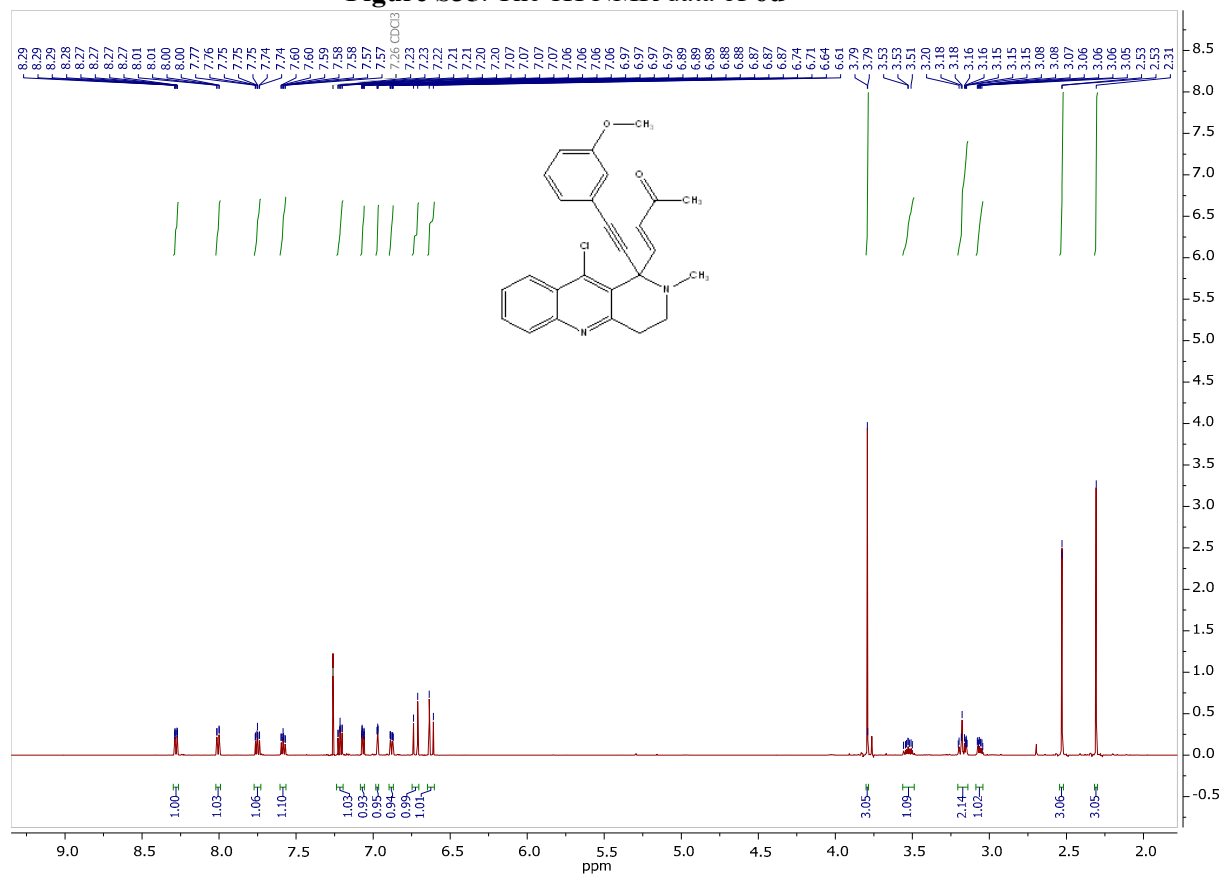

Figure S36. The  $^{13}\text{C}$  NMR data of **6d**

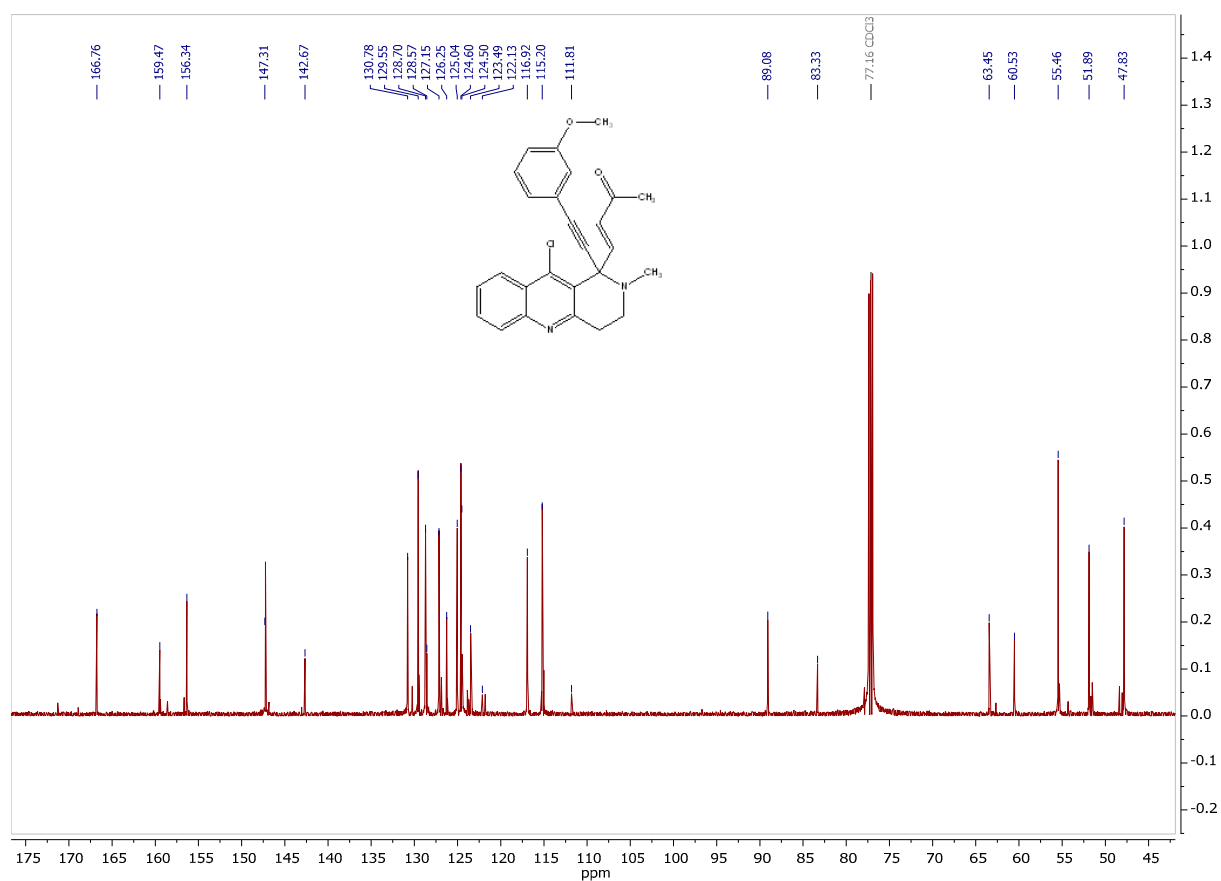

Figure S37. The  $^1\text{H}$  NMR data of **6e**

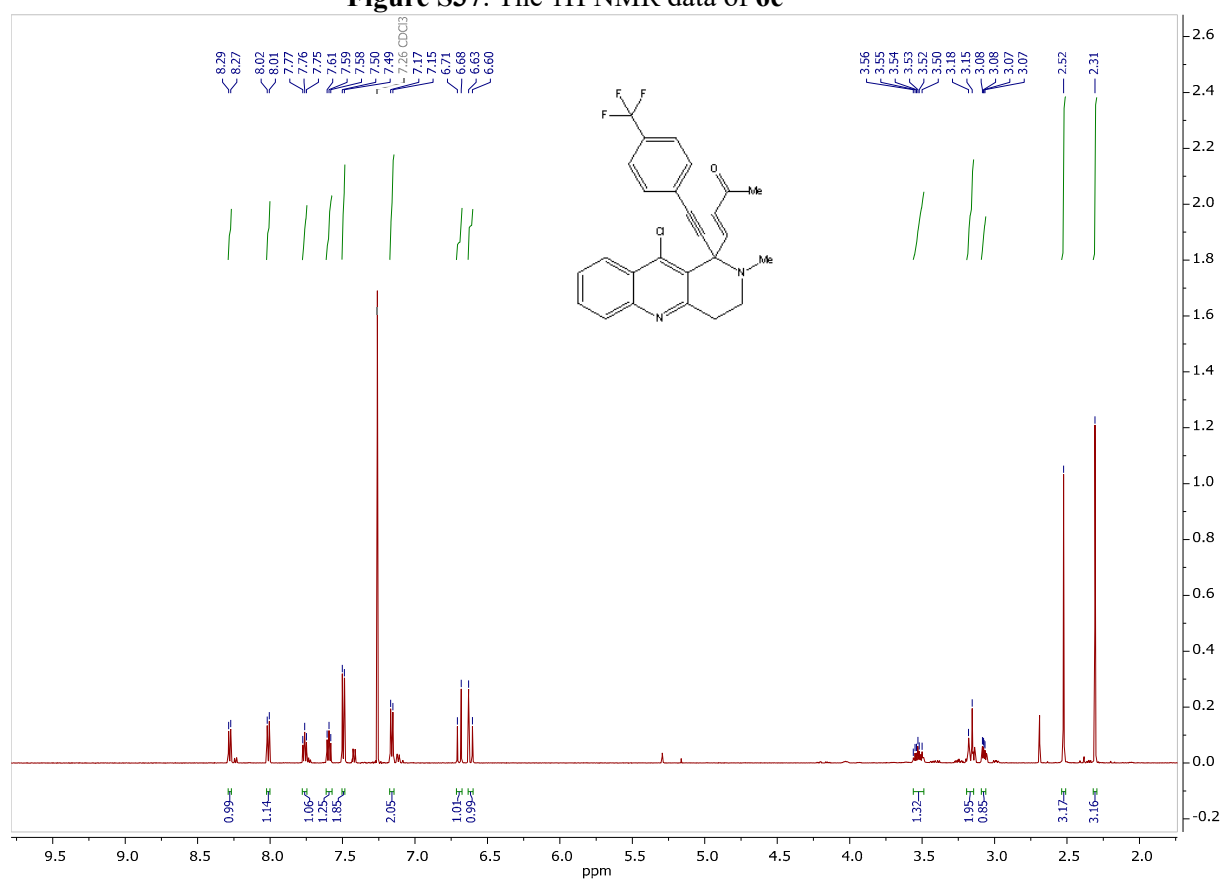

**Figure S38.** The  $^1\text{H}$  NMR data of **7**

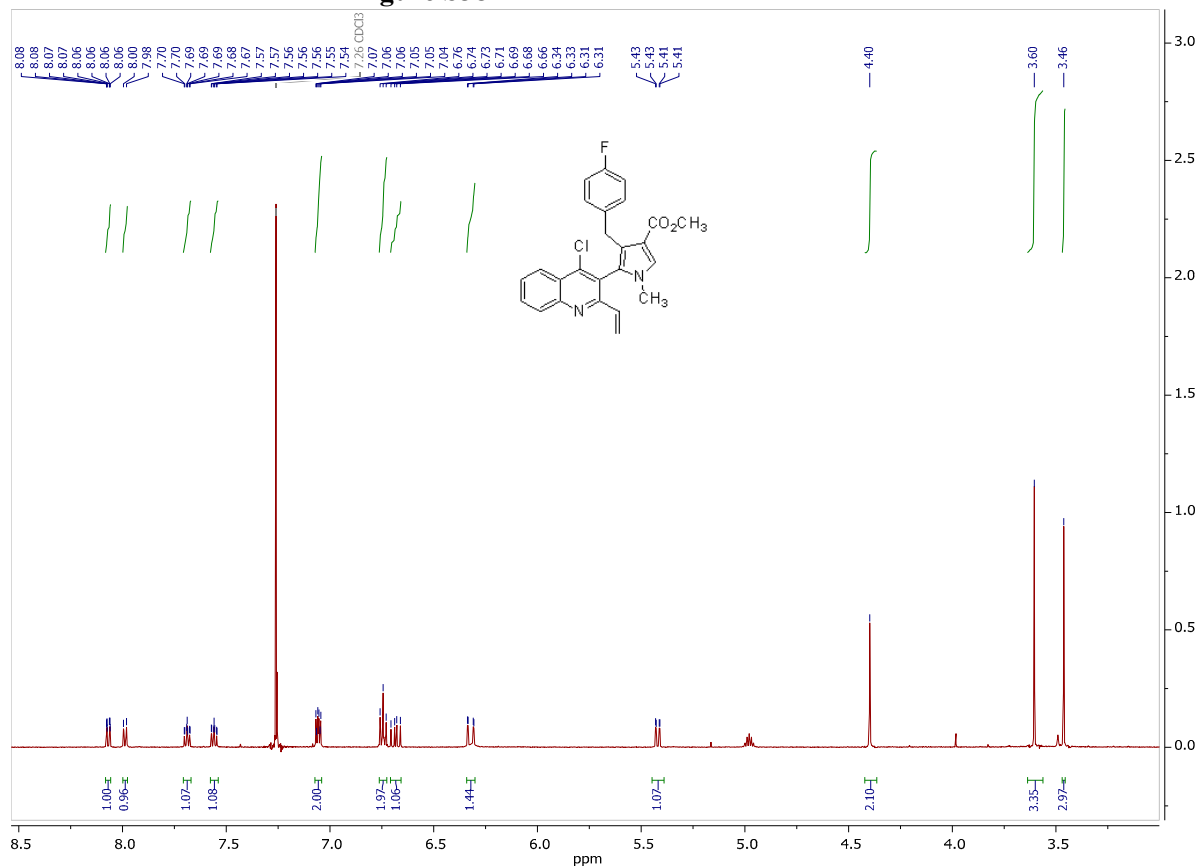

**Figure S39.** The  $^{13}\text{C}$  NMR data of **7**

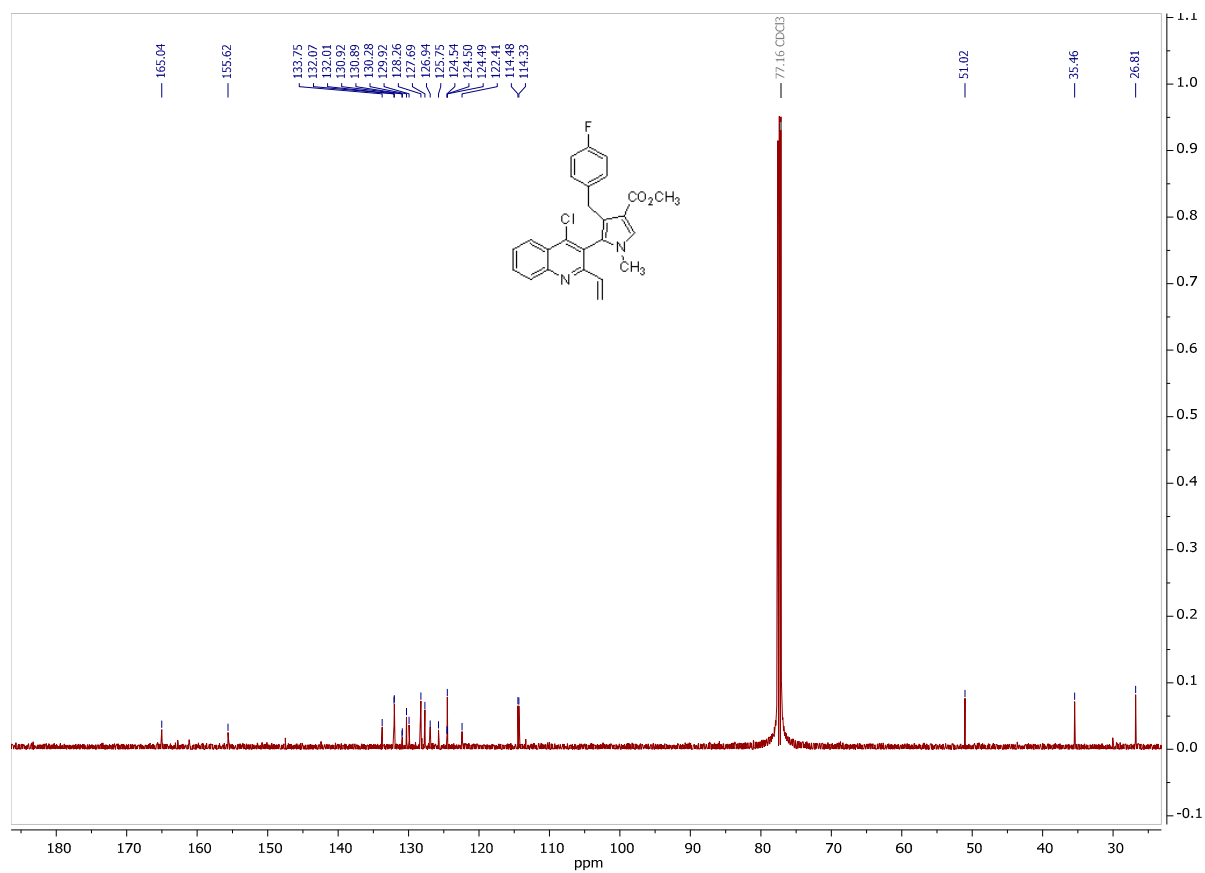

Figure S40. The  $^1\text{H}$  NMR data of **8a**

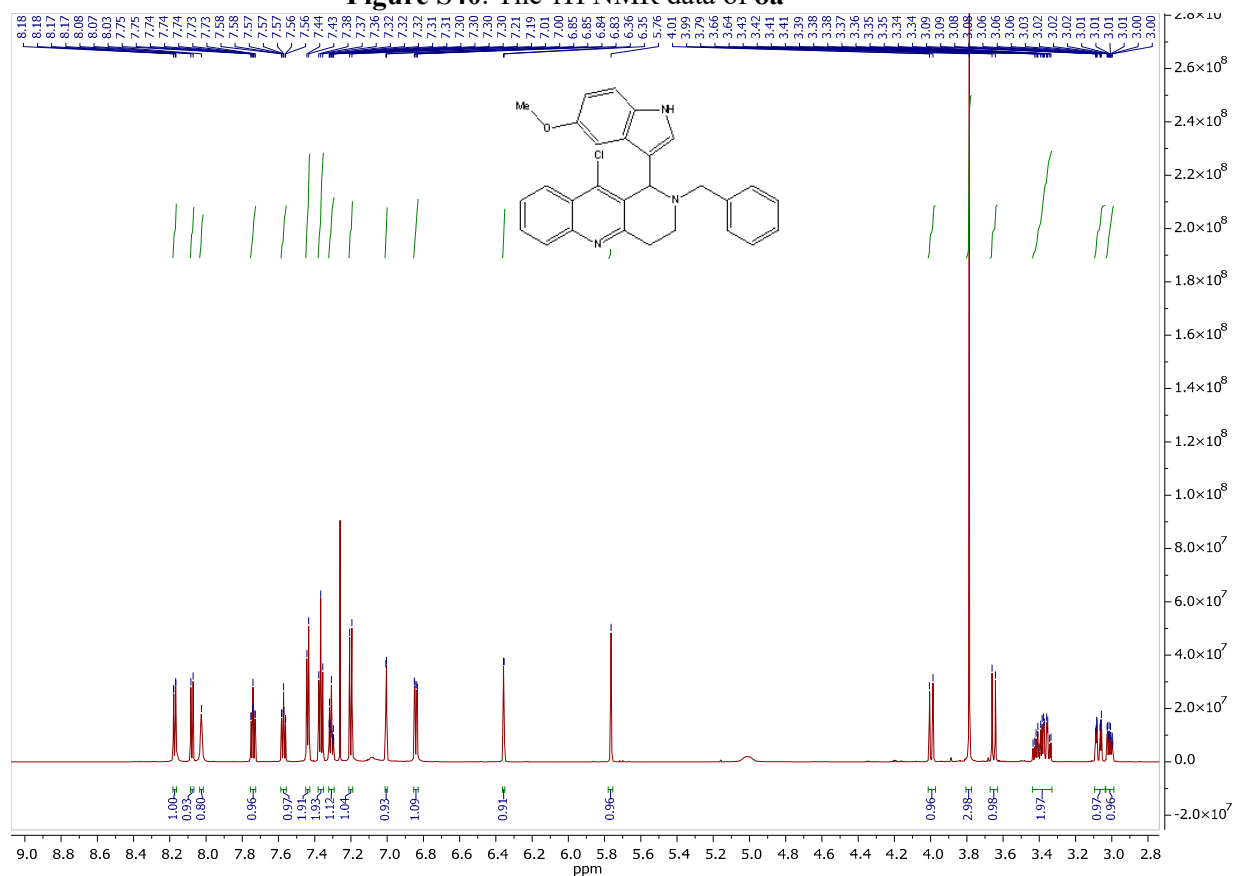

Figure S41. The  $^{13}\text{C}$  NMR data of **8a**

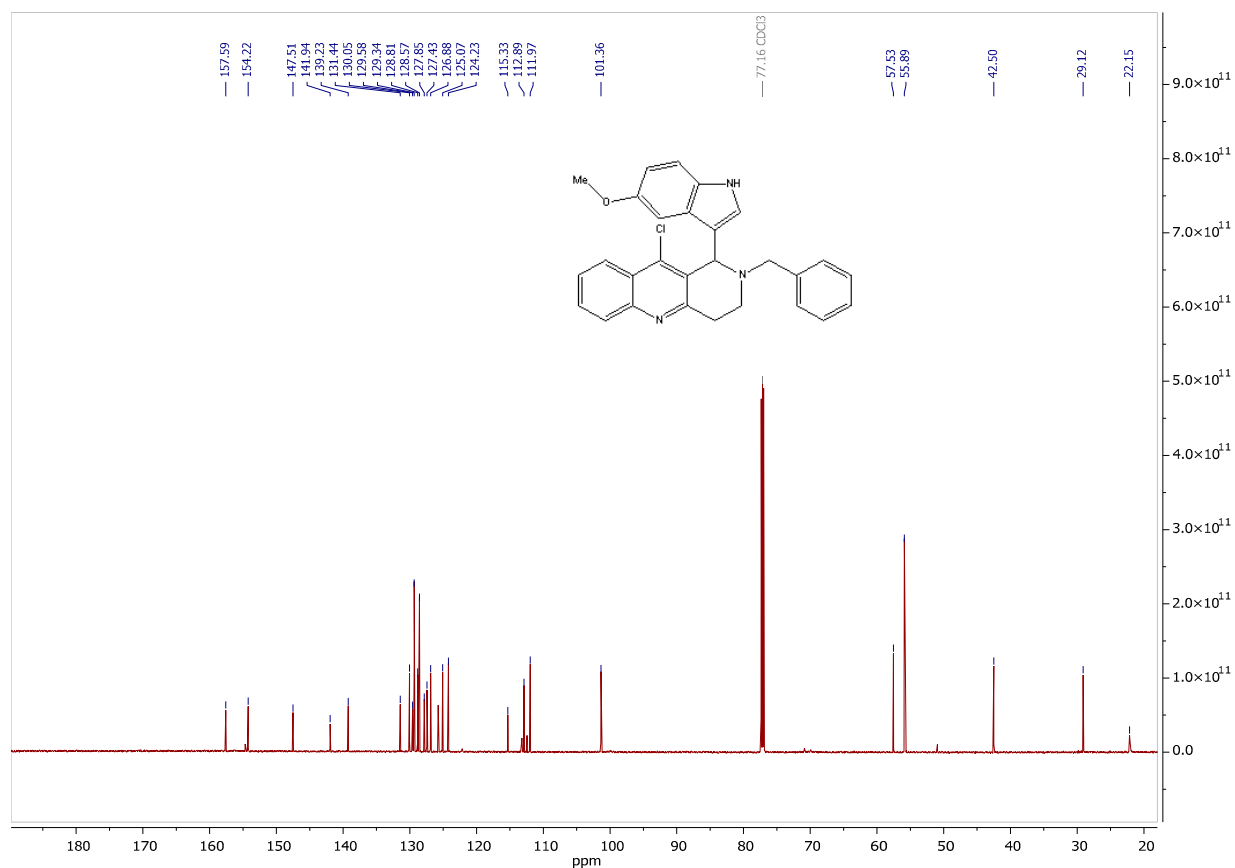

Figure S42. The  $^1\text{H}$  NMR data of **8b**

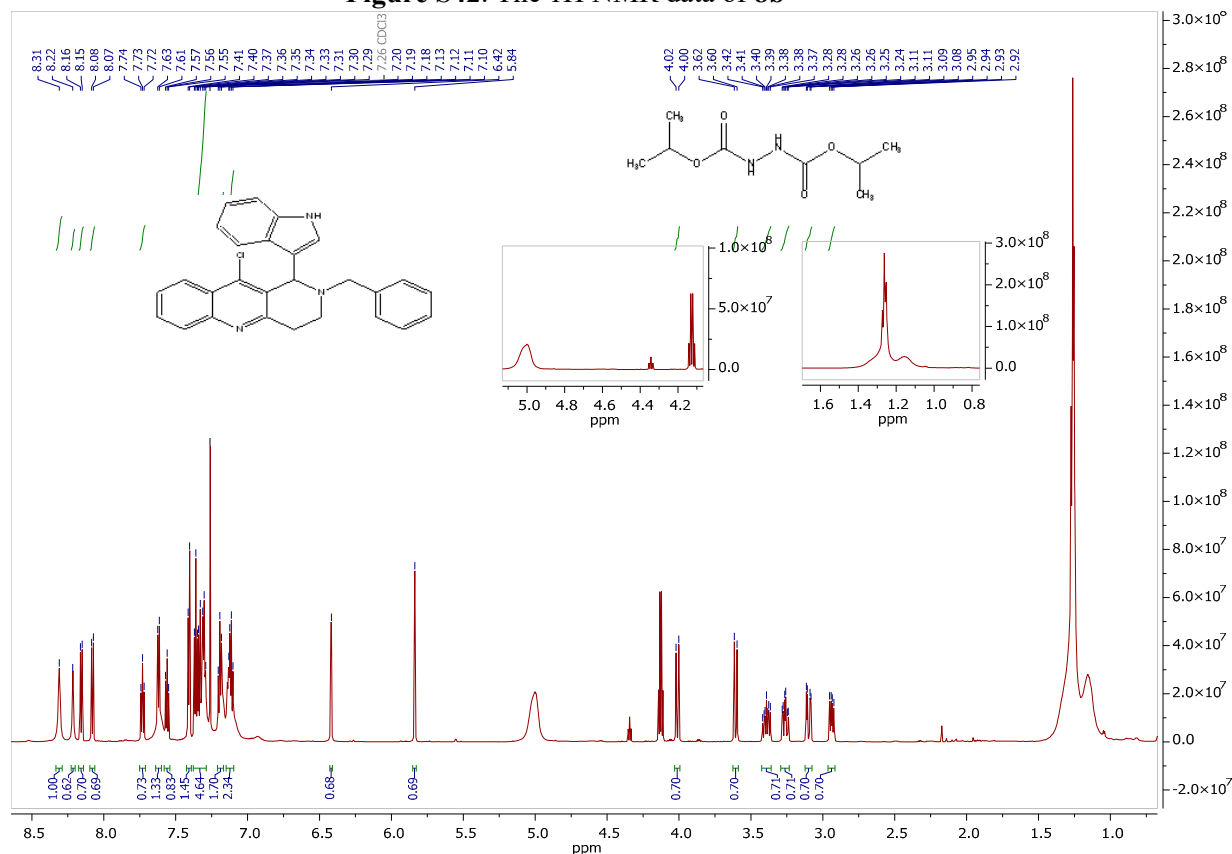

Figure S43. The  $^1\text{H}$  NMR data of **8c**

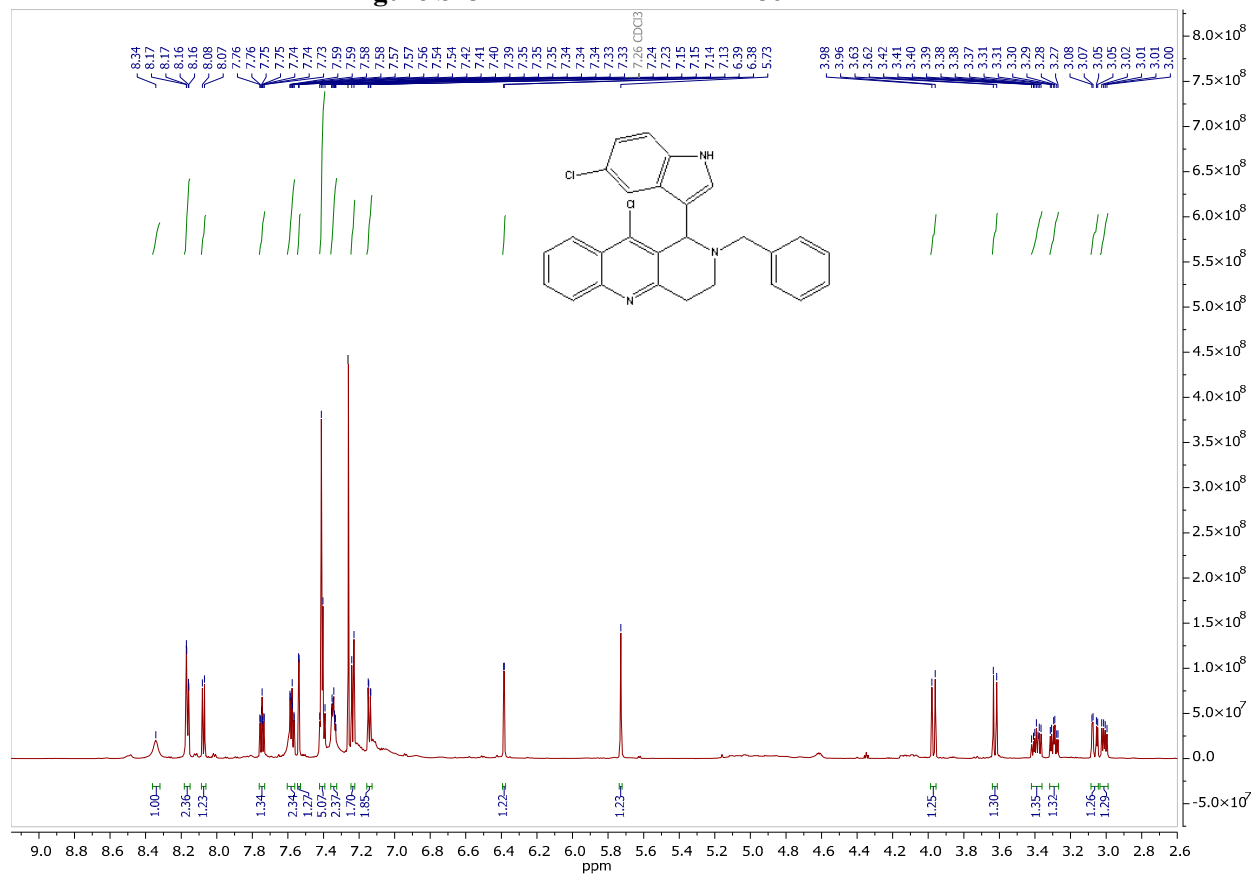

**Figure S44. The  $^1\text{H}$  NMR data of **8d****

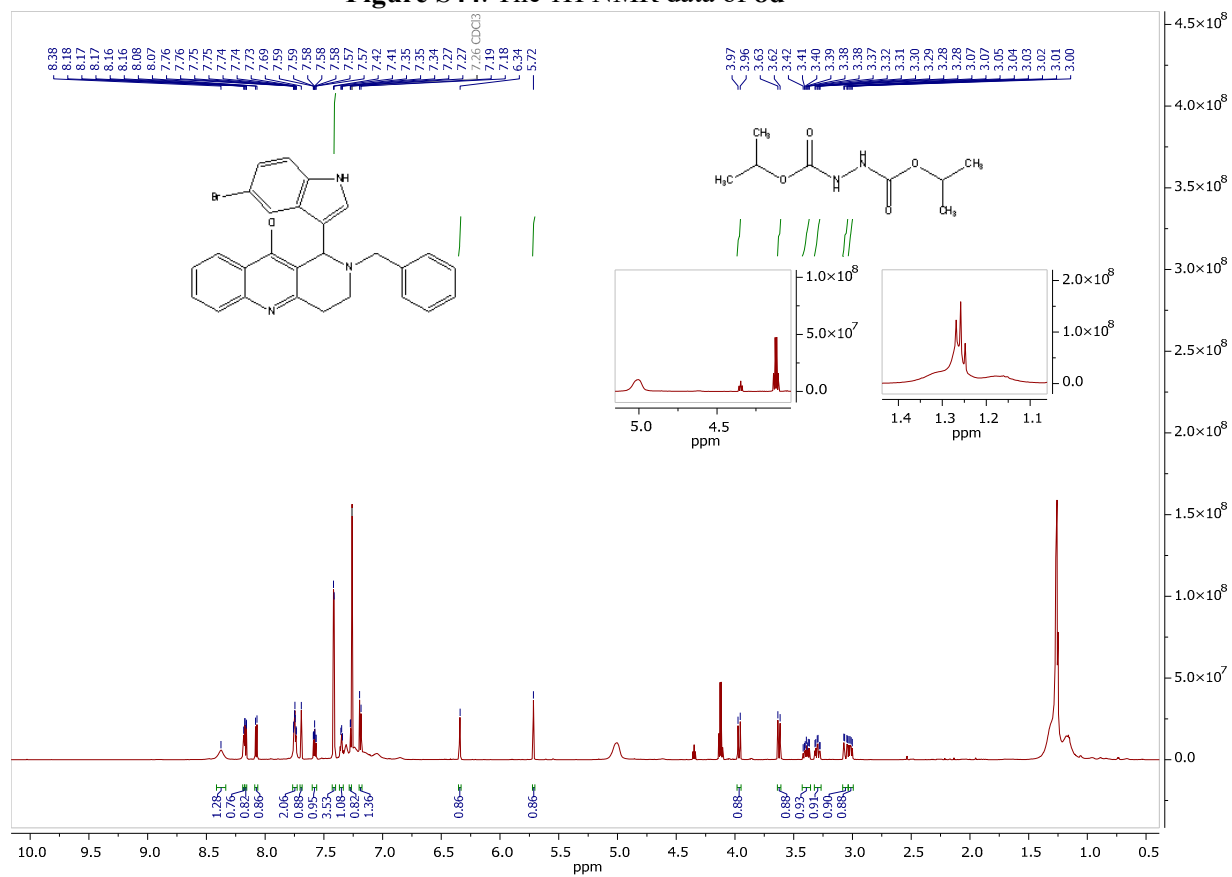

**Figure S45. The  $^1\text{H}$  NMR data of **10a****

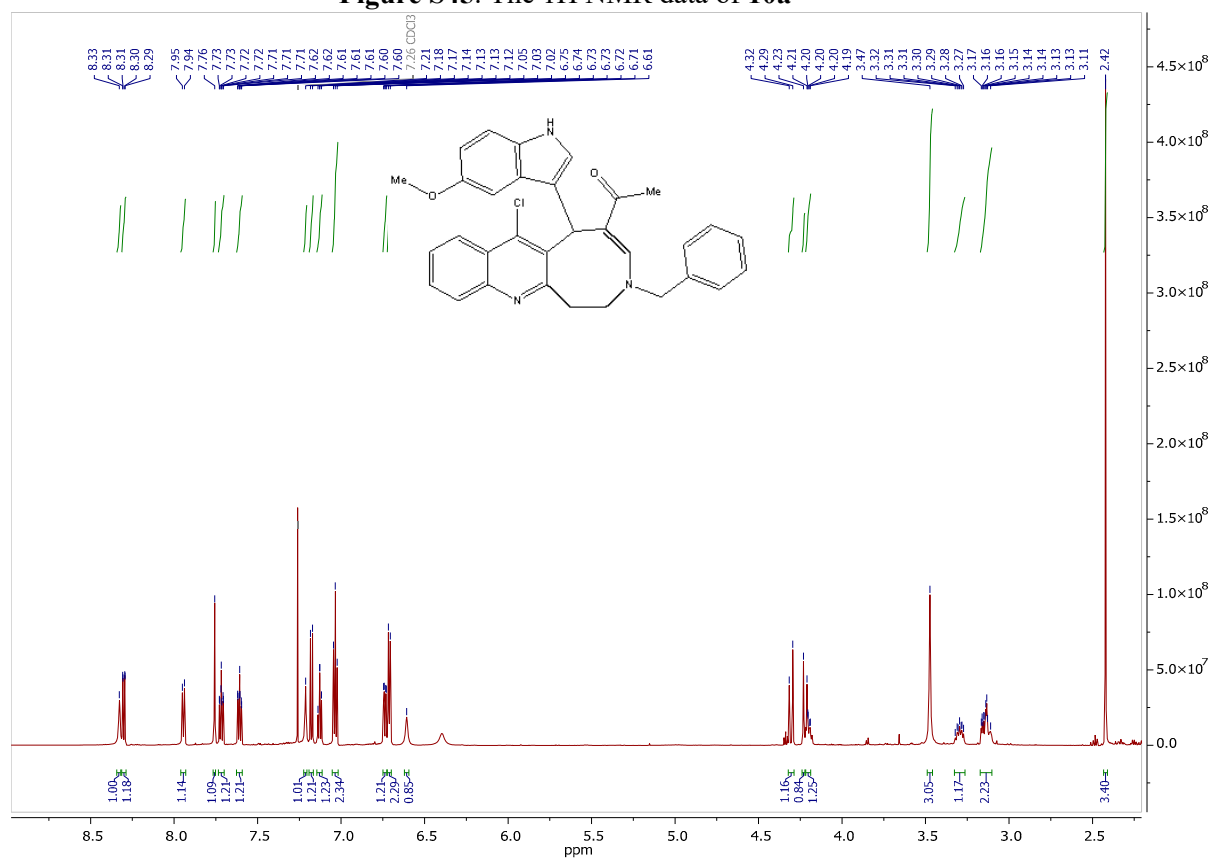

**Figure S46.** The  $^{13}\text{C}$  NMR data of **10a**

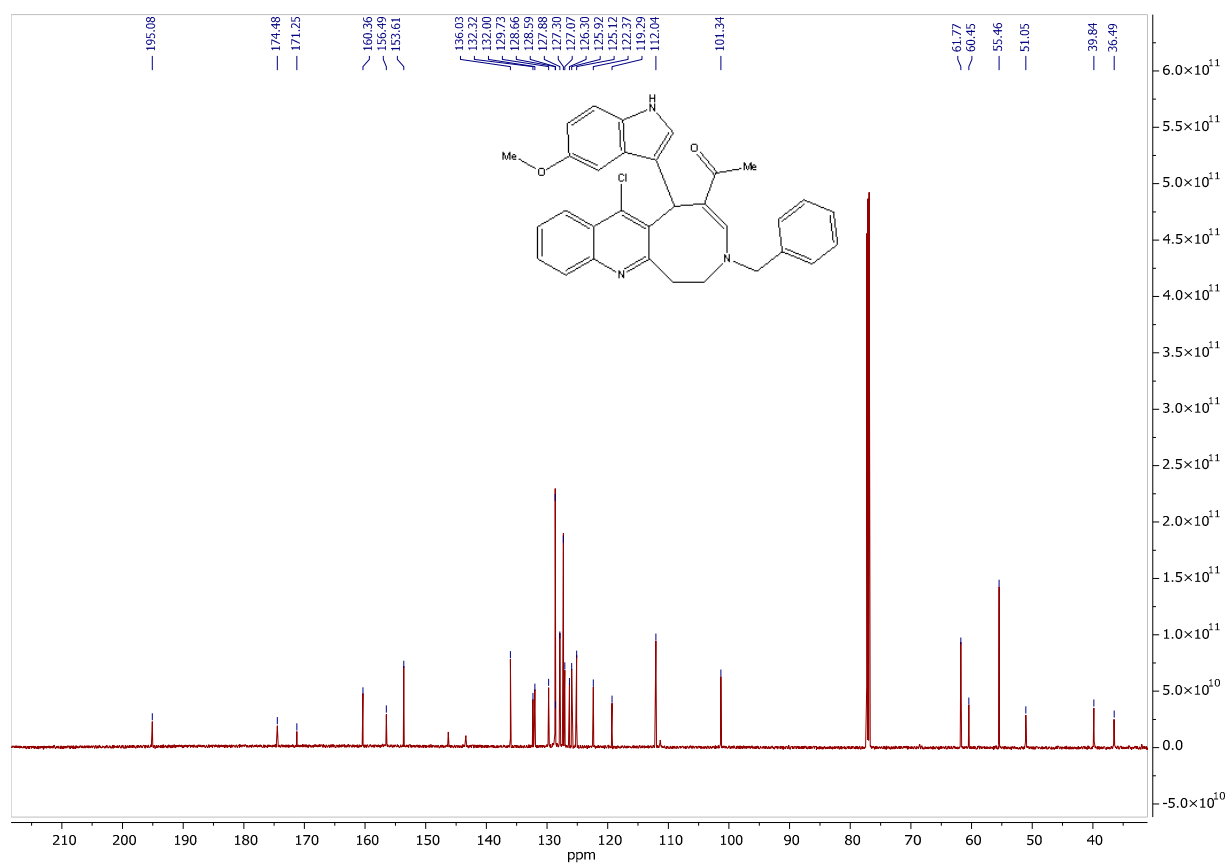

**Figure S47.** The  $^1\text{H}$  NMR data of **10b**

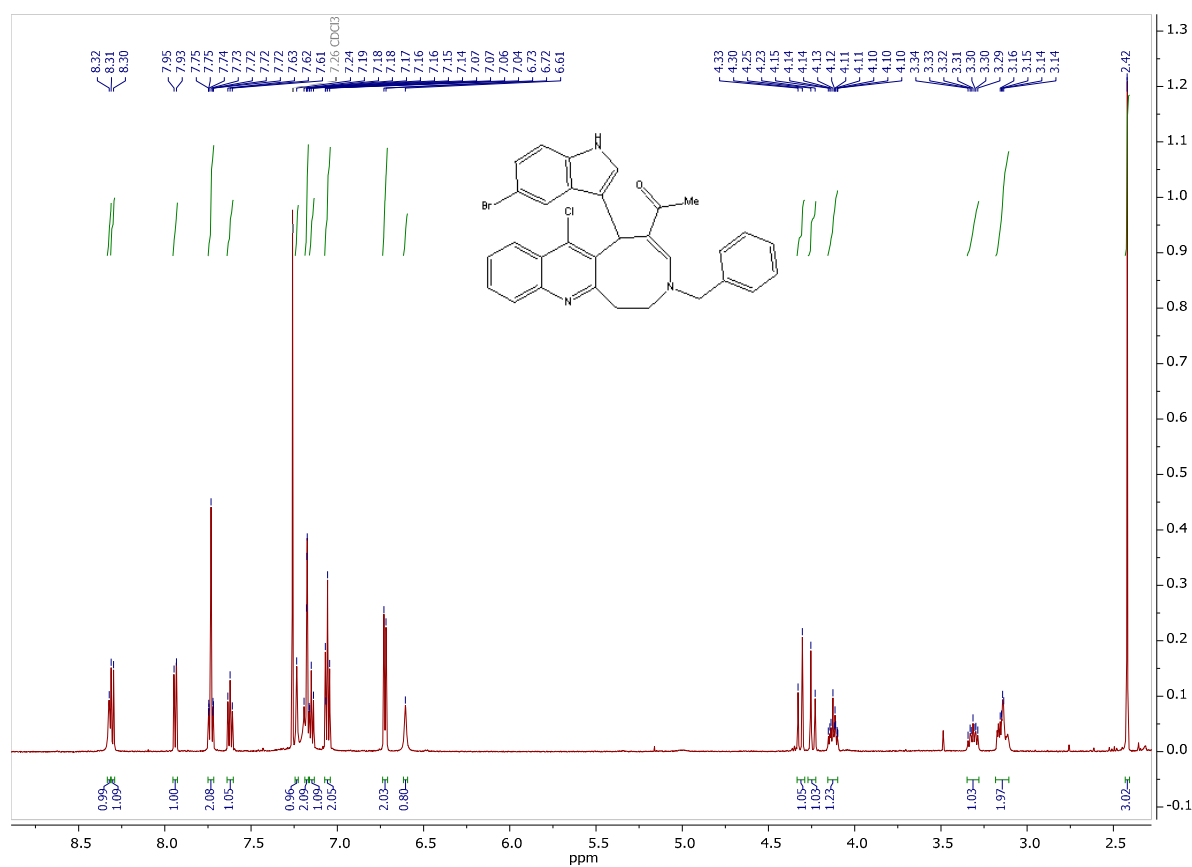



**Figure S48.** The  $^{13}\text{C}$  NMR data of **10b**

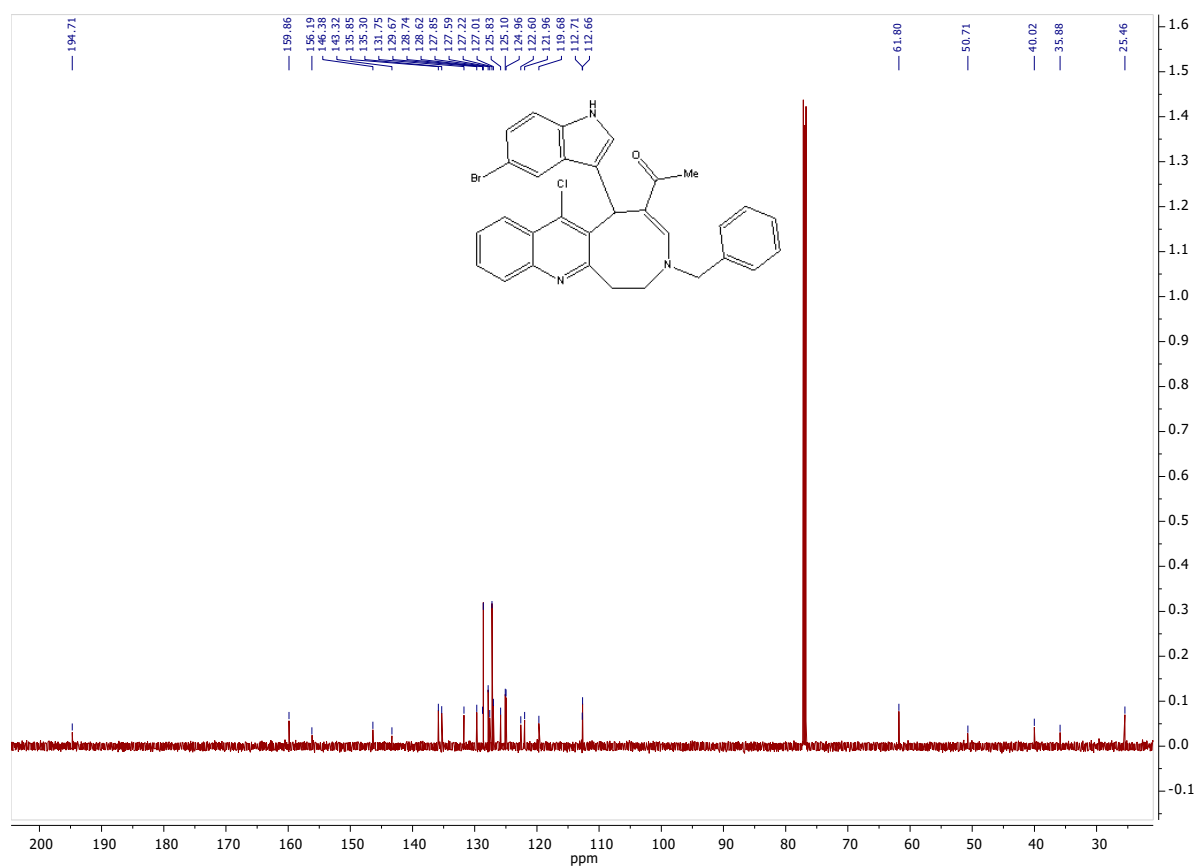

The crystallographic data compound **5a**.

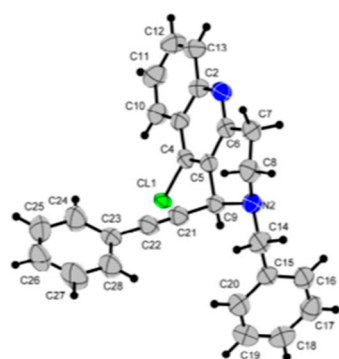

A single crystal X-ray analysis of compound **5a**.

**Table S1.** Crystal data and structure refinement for **5a**.

|                   |                                          |
|-------------------|------------------------------------------|
| Empirical formula | $\text{C}_{27}\text{H}_{21}\text{ClN}_2$ |
| Formula weight    | 408.91                                   |
| Temperature       | 295(2) K                                 |
| Wavelength        | 1.54186 Å                                |
| Crystal system    | Triclinic                                |
| Space group       | P -1                                     |

|                                   |                                             |                        |
|-----------------------------------|---------------------------------------------|------------------------|
| Unit cell dimensions              | a = 8.711(3) Å                              | $\alpha$ = 84.483(3)°. |
|                                   | b = 9.2683(3) Å                             | $\beta$ = 77.132(3)°.  |
|                                   | c = 14.6665(5) Å                            | $\gamma$ = 67.091(3)°. |
| Volume                            | 1063.2(4) Å <sup>3</sup>                    |                        |
| Z                                 | 2                                           |                        |
| Density (calculated)              | 1.277 Mg/m <sup>3</sup>                     |                        |
| Absorption coefficient            | 1.698 mm <sup>-1</sup>                      |                        |
| F(000)                            | 428                                         |                        |
| Theta range for data collection   | 5.181 to 67.500°.                           |                        |
| Index ranges                      | -9<=h<=10, -7<=k<=11, -16<=l<=17            |                        |
| Reflections collected             | 10522                                       |                        |
| Independent reflections           | 3611 [R(int) = 0.0414]                      |                        |
| Completeness to theta = 67.500°   | 94.2 %                                      |                        |
| Refinement method                 | Full-matrix least-squares on F <sup>2</sup> |                        |
| Data / restraints / parameters    | 3611 / 0 / 276                              |                        |
| Goodness-of-fit on F <sup>2</sup> | 0.834                                       |                        |
| Final R indices [I>2sigma(I)]     | R1 = 0.0372, wR2 = 0.0798                   |                        |
| R indices (all data)              | R1 = 0.0698, wR2 = 0.0871                   |                        |
| Extinction coefficient            | 0.0067(4)                                   |                        |
| Largest diff. peak and hole       | 0.152 and -0.191 e. Å <sup>-3</sup>         |                        |
